# Supplementary material for: Major medical causes by breed and life stage for dogs presented at veterinary clinics in the Republic of Korea: a survey of electronic medical records
Source: PeerJ. 2018 Jul 3;6:e5161. doi: 10.7717/peerj.5161 (PMC6035722; doi:10.7717/peerj.5161)
Supplement: Supplemental Information 1 — We mixed all collected data from eleven veterinary clinics; repeated ongoing events within individual cases were excluded. A single line in the file holds the categories (heads) describing each type of data information in the raw data file. Data: Dates of visits to the veterinary clinic; Case Number (given by author); Breed, Age, Sex. Presenting signs and diagnoses: terms provided by the authors during analysis; if a patient had more than one disease, we separated them on individual lines. ICD category: categories provided by the authors during analysis; if a patient had more than one disease, we separated them on individual lines. [file peerj-06-5161-s001.xlsx]

## Sheet: Raw data
Case No.	Breed	Age (years)	Sex	Symptoms or signs	ICD category
1	Maltese	< 1 y	M	coronavirus infection	Certain infectious or parasitic diseases
2	Welsh Corgis	1	M	coronavirus infection	Certain infectious or parasitic diseases
3	Chihuahua	1	M	coronavirus infection	Certain infectious or parasitic diseases
4	Miniature Pinscher	1	F	coronavirus infection	Certain infectious or parasitic diseases
5	Poodle	1	M	coronavirus infection	Certain infectious or parasitic diseases
6	Poodle	1	F	coronavirus infection	Certain infectious or parasitic diseases
7	Maltese	1	M	coronavirus infection	Certain infectious or parasitic diseases
8	Maltese	1	M	coronavirus infection	Certain infectious or parasitic diseases
9	Labrador Retriever	1	F	coronavirus infection	Certain infectious or parasitic diseases
10	Mixed	1	M	coronavirus infection	Certain infectious or parasitic diseases
11	Jindo Dog	1	F	coronavirus infection	Certain infectious or parasitic diseases
12	Poodle	1	M	coronavirus infection	Certain infectious or parasitic diseases
13	Maltese	3	M	coronavirus infection	Certain infectious or parasitic diseases
14	Mixed	1	F	coronavirus infection	Certain infectious or parasitic diseases
15	Jindo Dog	1	M	coronavirus infection	Certain infectious or parasitic diseases
16	Pomeranian	4	M	coronavirus infection	Certain infectious or parasitic diseases
17	Dachshund	< 1 y	F	coronavirus infection	Certain infectious or parasitic diseases
18	Cocker Spaniel	10	M	dispemtervirus infection	Certain infectious or parasitic diseases
19	Chihuahua	1	F	dispemtervirus infection	Certain infectious or parasitic diseases
20	Welsh Corgis	1	M	dispemtervirus infection	Certain infectious or parasitic diseases
21	Poodle	1	F	dispemtervirus infection	Certain infectious or parasitic diseases
22	Poodle	1	F	dispemtervirus infection	Certain infectious or parasitic diseases
23	Poodle	1	F	dispemtervirus infection	Certain infectious or parasitic diseases
24	French Bulldog	2	F	dispemtervirus infection	Certain infectious or parasitic diseases
25	Pomeranian	4	M	dispemtervirus infection	Certain infectious or parasitic diseases
26	Pomeranian	4	M	dispemtervirus infection	Certain infectious or parasitic diseases
27	Maltese	5	M	dispemtervirus infection	Certain infectious or parasitic diseases
28	Maltese	6	M	dispemtervirus infection	Certain infectious or parasitic diseases
29	Shih Tzu	9	F	dispemtervirus infection	Certain infectious or parasitic diseases
30	Jindo Dog	1	F	ectoparasite	Certain infectious or parasitic diseases
31	Jindo Dog	1	M	ectoparasite	Certain infectious or parasitic diseases
32	Jindo Dog	1	M	ectoparasite	Certain infectious or parasitic diseases
33	unknown	1	M	ectoparasite	Certain infectious or parasitic diseases
34	Poodle	3	M	ectoparasite	Certain infectious or parasitic diseases
35	Sapsaree	1	F	ectoparasite	Certain infectious or parasitic diseases
36	Boston Terrier	1	M	ectoparasite	Certain infectious or parasitic diseases
37	Pomeranian	2	F	ectoparasite	Certain infectious or parasitic diseases
38	Poodle	3	M	ectoparasite	Certain infectious or parasitic diseases
39	Pomeranian	5	F	ectoparasite	Certain infectious or parasitic diseases
40	Cocker Spaniel	13	M	ectoparasite	Certain infectious or parasitic diseases
41	Jindo Dog	14	M	ectoparasite	Certain infectious or parasitic diseases
42	Mixed	< 1 y	F	endoparasites	Certain infectious or parasitic diseases
43	Pungsan Dog	< 1 y	M	endoparasites	Certain infectious or parasitic diseases
44	Welsh Corgis	< 1 y	M	endoparasites	Certain infectious or parasitic diseases
45	Mixed	1	M	endoparasites	Certain infectious or parasitic diseases
46	Pungsan Dog	1	F	endoparasites	Certain infectious or parasitic diseases
47	Shar-Pei	1	M	endoparasites	Certain infectious or parasitic diseases
48	Golden Retriever	1	M	endoparasites	Certain infectious or parasitic diseases
49	Golden Retriever	1	M	endoparasites	Certain infectious or parasitic diseases
50	Welsh Corgis	1	F	endoparasites	Certain infectious or parasitic diseases
51	unknown	1	F	endoparasites	Certain infectious or parasitic diseases
52	Golden Retriever	1	M	endoparasites	Certain infectious or parasitic diseases
53	unknown	1	M	endoparasites	Certain infectious or parasitic diseases
54	French Bulldog	1	M	endoparasites	Certain infectious or parasitic diseases
55	Mixed	1	M	endoparasites	Certain infectious or parasitic diseases
56	Mixed	1	M	endoparasites	Certain infectious or parasitic diseases
57	Mixed	1	M	endoparasites	Certain infectious or parasitic diseases
58	Jindo Dog	1	M	endoparasites	Certain infectious or parasitic diseases
59	Siberian Husky	1	F	endoparasites	Certain infectious or parasitic diseases
60	Mixed	1	M	endoparasites	Certain infectious or parasitic diseases
61	Mixed	1	F	endoparasites	Certain infectious or parasitic diseases
62	Dachshund	1	M	endoparasites	Certain infectious or parasitic diseases
63	unknown	1	F	endoparasites	Certain infectious or parasitic diseases
64	Jindo Dog	1	M	endoparasites	Certain infectious or parasitic diseases
65	Greyhound	2	M	endoparasites	Certain infectious or parasitic diseases
66	Poodle	2	M	endoparasites	Certain infectious or parasitic diseases
67	Poodle	2	F	endoparasites	Certain infectious or parasitic diseases
68	Samoyed	< 1 y	M	endoparasites	Certain infectious or parasitic diseases
69	Poodle	3	M	endoparasites	Certain infectious or parasitic diseases
70	Mixed	unknown	F	endoparasites	Certain infectious or parasitic diseases
71	Poodle	10	M	Heartworm disease	Certain infectious or parasitic diseases
72	Cocker Spaniel	13	M	Heartworm disease	Certain infectious or parasitic diseases
73	Poodle	13	M	Heartworm disease	Certain infectious or parasitic diseases
74	Jindo Dog	14	M	Heartworm disease	Certain infectious or parasitic diseases
75	Miniature Pinscher	15	M	Heartworm disease	Certain infectious or parasitic diseases
76	Miniature Pinscher	15	M	Heartworm disease	Certain infectious or parasitic diseases
77	Mixed	16	M	Heartworm disease	Certain infectious or parasitic diseases
78	Mixed	16	F	Heartworm disease	Certain infectious or parasitic diseases
79	French Bulldog	1	M	Heartworm disease	Certain infectious or parasitic diseases
80	Maltese	1	F	Heartworm disease	Certain infectious or parasitic diseases
81	Maltese	1	M	Heartworm disease	Certain infectious or parasitic diseases
82	Boston Terrier	1	M	Heartworm disease	Certain infectious or parasitic diseases
83	Chihuahua	1	F	Heartworm disease	Certain infectious or parasitic diseases
84	Pomeranian	2	F	Heartworm disease	Certain infectious or parasitic diseases
85	Poodle	2	M	Heartworm disease	Certain infectious or parasitic diseases
86	Poodle	2	M	Heartworm disease	Certain infectious or parasitic diseases
87	Cocker Spaniel	2	F	Heartworm disease	Certain infectious or parasitic diseases
88	Maltese	2	M	Heartworm disease	Certain infectious or parasitic diseases
89	Poodle	2	M	Heartworm disease	Certain infectious or parasitic diseases
90	Belgian Tervuren	2	M	Heartworm disease	Certain infectious or parasitic diseases
91	Mixed	3	F	Heartworm disease	Certain infectious or parasitic diseases
92	Poodle	3	M	Heartworm disease	Certain infectious or parasitic diseases
93	Mixed	3	M	Heartworm disease	Certain infectious or parasitic diseases
94	Maltese	3	F	Heartworm disease	Certain infectious or parasitic diseases
95	Shih Tzu	3	F	Heartworm disease	Certain infectious or parasitic diseases
96	Poodle	3	M	Heartworm disease	Certain infectious or parasitic diseases
97	Dalmatian	3	F	Heartworm disease	Certain infectious or parasitic diseases
98	Cocker Spaniel	3	M	Heartworm disease	Certain infectious or parasitic diseases
99	Yorkshire Terrier	3	M	Heartworm disease	Certain infectious or parasitic diseases
100	unknown	4	M	Heartworm disease	Certain infectious or parasitic diseases
101	Maltese	4	M	Heartworm disease	Certain infectious or parasitic diseases
102	unknown	4	F	Heartworm disease	Certain infectious or parasitic diseases
103	Miniature Pinscher	4	M	Heartworm disease	Certain infectious or parasitic diseases
104	Miniature Pinscher	4	F	Heartworm disease	Certain infectious or parasitic diseases
105	Maltese	4	M	Heartworm disease	Certain infectious or parasitic diseases
106	Dachshund	4	F	Heartworm disease	Certain infectious or parasitic diseases
107	Poodle	4	M	Heartworm disease	Certain infectious or parasitic diseases
108	Mixed	4	M	Heartworm disease	Certain infectious or parasitic diseases
109	Maltese	4	M	Heartworm disease	Certain infectious or parasitic diseases
110	Maltese	4	M	Heartworm disease	Certain infectious or parasitic diseases
111	Mixed	4	M	Heartworm disease	Certain infectious or parasitic diseases
112	Siberian Husky	5	F	Heartworm disease	Certain infectious or parasitic diseases
113	Jindo Dog	5	M	Heartworm disease	Certain infectious or parasitic diseases
114	Mixed	5	unknown	Heartworm disease	Certain infectious or parasitic diseases
115	Cocker Spaniel	5	M	Heartworm disease	Certain infectious or parasitic diseases
116	Mixed	5	F	Heartworm disease	Certain infectious or parasitic diseases
117	Pomeranian	5	F	Heartworm disease	Certain infectious or parasitic diseases
118	Jindo Dog	6	M	Heartworm disease	Certain infectious or parasitic diseases
119	unknown	6	F	Heartworm disease	Certain infectious or parasitic diseases
120	Jindo Dog	6	F	Heartworm disease	Certain infectious or parasitic diseases
121	Jindo Dog	7	F	Heartworm disease	Certain infectious or parasitic diseases
122	Mixed	7	M	Heartworm disease	Certain infectious or parasitic diseases
123	Akita	7	F	Heartworm disease	Certain infectious or parasitic diseases
124	Cocker Spaniel	8	F	Heartworm disease	Certain infectious or parasitic diseases
125	Mixed	8	M	Heartworm disease	Certain infectious or parasitic diseases
126	Poodle	9	F	Heartworm disease	Certain infectious or parasitic diseases
127	Jindo Dog	3	M	Heartworm disease	Certain infectious or parasitic diseases
128	Poodle	5	F	Heartworm disease	Certain infectious or parasitic diseases
129	SAPSAREE	5	F	Heartworm disease	Certain infectious or parasitic diseases
130	Miniature Pinscher	9	F	Heartworm disease	Certain infectious or parasitic diseases
131	Mixed	unknown	M	Heartworm disease	Certain infectious or parasitic diseases
132	Bichon Frise	< 1 y	M	parvovirus infection	Certain infectious or parasitic diseases
133	Dachshund	< 1 y	F	parvovirus infection	Certain infectious or parasitic diseases
134	Boston Terrier	1	F	parvovirus infection	Certain infectious or parasitic diseases
135	French Bulldog	1	M	parvovirus infection	Certain infectious or parasitic diseases
136	Jindo Dog	1	M	parvovirus infection	Certain infectious or parasitic diseases
137	Poodle	1	F	parvovirus infection	Certain infectious or parasitic diseases
138	Pomeranian	1	M	parvovirus infection	Certain infectious or parasitic diseases
139	Mixed	1	F	parvovirus infection	Certain infectious or parasitic diseases
140	Maltese	1	M	parvovirus infection	Certain infectious or parasitic diseases
141	Pomeranian	1	M	parvovirus infection	Certain infectious or parasitic diseases
142	Mixed	1	F	parvovirus infection	Certain infectious or parasitic diseases
143	Poodle	1	M	parvovirus infection	Certain infectious or parasitic diseases
144	Poodle	1	M	parvovirus infection	Certain infectious or parasitic diseases
145	Poodle	1	M	parvovirus infection	Certain infectious or parasitic diseases
146	Poodle	1	M	parvovirus infection	Certain infectious or parasitic diseases
147	Mixed	1	F	parvovirus infection	Certain infectious or parasitic diseases
148	Mixed	1	M	parvovirus infection	Certain infectious or parasitic diseases
149	Dachshund	1	M	parvovirus infection	Certain infectious or parasitic diseases
150	Mixed	1	M	parvovirus infection	Certain infectious or parasitic diseases
151	unknown	1	M	parvovirus infection	Certain infectious or parasitic diseases
152	Pomeranian	1	M	parvovirus infection	Certain infectious or parasitic diseases
153	Jindo Dog	1	M	parvovirus infection	Certain infectious or parasitic diseases
154	Sapsaree	1	F	parvovirus infection	Certain infectious or parasitic diseases
155	Jindo Dog	1	M	parvovirus infection	Certain infectious or parasitic diseases
156	Jindo Dog	1	M	parvovirus infection	Certain infectious or parasitic diseases
157	Chihuahua	1	M	parvovirus infection	Certain infectious or parasitic diseases
158	Miniature Pinscher	1	F	parvovirus infection	Certain infectious or parasitic diseases
159	Jindo Dog	1	M	parvovirus infection	Certain infectious or parasitic diseases
160	Mixed	1	M	parvovirus infection	Certain infectious or parasitic diseases
161	Mixed	1	M	parvovirus infection	Certain infectious or parasitic diseases
162	Jindo Dog	1	F	parvovirus infection	Certain infectious or parasitic diseases
163	spitz	1	F	parvovirus infection	Certain infectious or parasitic diseases
164	Jindo Dog	1	M	parvovirus infection	Certain infectious or parasitic diseases
165	unknown	1	M	parvovirus infection	Certain infectious or parasitic diseases
166	PUNGSAN DOG	1	M	parvovirus infection	Certain infectious or parasitic diseases
167	unknown	1	F	parvovirus infection	Certain infectious or parasitic diseases
168	Mixed	1	F	parvovirus infection	Certain infectious or parasitic diseases
169	Sapsaree	1	M	parvovirus infection	Certain infectious or parasitic diseases
170	Sapsaree	1	F	parvovirus infection	Certain infectious or parasitic diseases
171	Poodle	1	M	parvovirus infection	Certain infectious or parasitic diseases
172	Pekingese	2	F	parvovirus infection	Certain infectious or parasitic diseases
173	Siberian Laikas	2	M	parvovirus infection	Certain infectious or parasitic diseases
174	SAPSAREE	2	M	parvovirus infection	Certain infectious or parasitic diseases
175	unknown	2	M	parvovirus infection	Certain infectious or parasitic diseases
176	Mixed	2	F	parvovirus infection	Certain infectious or parasitic diseases
177	Mixed	3	M	parvovirus infection	Certain infectious or parasitic diseases
178	Labrador Retriever	2	M	sepsis	Certain infectious or parasitic diseases
179	Bichon Frise	3	F	sepsis	Certain infectious or parasitic diseases
180	Mixed	unknown	M	sepsis	Certain infectious or parasitic diseases
181	Yorkshire Terrier	17	M	SIRS	Certain infectious or parasitic diseases
182	Maltese	12	M	Dental care	Dental care
183	Maltese	12	M	Dental care	Dental care
184	Yorkshire Terrier	12	M	Dental care	Dental care
185	Yorkshire Terrier	14	M	Dental care	Dental care
186	Maltese	16	M	Dental care	Dental care
187	Poodle	2	M	Dental care	Dental care
188	Pomeranian	4	M	Dental care	Dental care
189	Maltese	6	M	Dental care	Dental care
190	Schnauzers	7	M	Dental care	Dental care
191	Maltese	9	M	Dental care	Dental care
192	Maltese	4	M	foreign bodies	Dental care
193	Poodle	10	M	gingivatitis	Dental care
194	Poodle	10	M	gingivatitis	Dental care
195	Pomeranian	10	F	gingivatitis	Dental care
196	Shih Tzu	10	M	gingivatitis	Dental care
197	Shih Tzu	10	M	gingivatitis	Dental care
198	Yorkshire Terrier	10	M	gingivatitis	Dental care
199	Yorkshire Terrier	11	M	gingivatitis	Dental care
200	Yorkshire Terrier	11	M	gingivatitis	Dental care
201	Mixed	11	M	gingivatitis	Dental care
202	Shih Tzu	11	F	gingivatitis	Dental care
203	Miniature Pinscher	11	M	gingivatitis	Dental care
204	Mixed	11	F	gingivatitis	Dental care
205	Pomeranian	11	F	gingivatitis	Dental care
206	Yorkshire Terrier	12	M	gingivatitis	Dental care
207	Maltese	12	F	gingivatitis	Dental care
208	Poodle	12	M	gingivatitis	Dental care
209	Cocker Spaniel	12	M	gingivatitis	Dental care
210	Miniature Pinscher	12	F	gingivatitis	Dental care
211	Yorkshire Terrier	12	M	gingivatitis	Dental care
212	Yorkshire Terrier	12	F	gingivatitis	Dental care
213	unknown	12	F	gingivatitis	Dental care
214	Maltese	12	M	gingivatitis	Dental care
215	Cocker Spaniel	13	M	gingivatitis	Dental care
216	Mixed	13	M	gingivatitis	Dental care
217	Pekingese	13	M	gingivatitis	Dental care
218	Maltese	13	F	gingivatitis	Dental care
219	Shih Tzu	13	M	gingivatitis	Dental care
220	Maltese	13	F	gingivatitis	Dental care
221	Maltese	13	M	gingivatitis	Dental care
222	Alaskan Malamute	13	M	gingivatitis	Dental care
223	Maltese	14	M	gingivatitis	Dental care
224	unknown	14	F	gingivatitis	Dental care
225	Maltese	14	M	gingivatitis	Dental care
226	Miniature Pinscher	14	M	gingivatitis	Dental care
227	Mixed	14	M	gingivatitis	Dental care
228	Siberian Husky	14	M	gingivatitis	Dental care
229	Maltese	15	M	gingivatitis	Dental care
230	Mixed	15	M	gingivatitis	Dental care
231	Poodle	15	M	gingivatitis	Dental care
232	Shih Tzu	16	M	gingivatitis	Dental care
233	Mixed	19	M	gingivatitis	Dental care
234	Chihuahua	1	M	gingivatitis	Dental care
235	Maltese	1	M	gingivatitis	Dental care
236	Pomeranian	2	F	gingivatitis	Dental care
237	Poodle	2	M	gingivatitis	Dental care
238	Maltese	2	M	gingivatitis	Dental care
239	Shih Tzu	2	M	gingivatitis	Dental care
240	Poodle	2	M	gingivatitis	Dental care
241	Poodle	2	M	gingivatitis	Dental care
242	Maltese	2	M	gingivatitis	Dental care
243	Maltese	2	M	gingivatitis	Dental care
244	Poodle	2	M	gingivatitis	Dental care
245	Poodle	3	F	gingivatitis	Dental care
246	Poodle	3	M	gingivatitis	Dental care
247	Maltese	3	F	gingivatitis	Dental care
248	Maltese	3	F	gingivatitis	Dental care
249	Poodle	3	M	gingivatitis	Dental care
250	Maltese	3	M	gingivatitis	Dental care
251	Yorkshire Terrier	3	F	gingivatitis	Dental care
252	Poodle	3	M	gingivatitis	Dental care
253	Mixed	3	M	gingivatitis	Dental care
254	Maltese	3	F	gingivatitis	Dental care
255	Poodle	3	F	gingivatitis	Dental care
256	Poodle	3	F	gingivatitis	Dental care
257	Pomeranian	3	M	gingivatitis	Dental care
258	Shih Tzu	3	M	gingivatitis	Dental care
259	Poodle	4	M	gingivatitis	Dental care
260	Maltese	4	M	gingivatitis	Dental care
261	Yorkshire Terrier	4	M	gingivatitis	Dental care
262	Shih Tzu	4	M	gingivatitis	Dental care
263	Bichon Frise	4	M	gingivatitis	Dental care
264	Yorkshire Terrier	4	M	gingivatitis	Dental care
265	spitz	4	M	gingivatitis	Dental care
266	Maltese	4	M	gingivatitis	Dental care
267	Pomeranian	4	M	gingivatitis	Dental care
268	Shih Tzu	4	M	gingivatitis	Dental care
269	Cocker Spaniel	4	M	gingivatitis	Dental care
270	Yorkshire Terrier	4	M	gingivatitis	Dental care
271	Poodle	4	M	gingivatitis	Dental care
272	Maltese	5	M	gingivatitis	Dental care
273	spitz	5	F	gingivatitis	Dental care
274	Poodle	5	F	gingivatitis	Dental care
275	Yorkshire Terrier	5	M	gingivatitis	Dental care
276	Maltese	5	M	gingivatitis	Dental care
277	Maltese	5	M	gingivatitis	Dental care
278	Pomeranian	5	M	gingivatitis	Dental care
279	Yorkshire Terrier	5	M	gingivatitis	Dental care
280	Maltese	5	M	gingivatitis	Dental care
281	Pomeranian	5	M	gingivatitis	Dental care
282	Pomeranian	5	M	gingivatitis	Dental care
283	Maltese	5	M	gingivatitis	Dental care
284	Mixed	6	M	gingivatitis	Dental care
285	Shih Tzu	6	M	gingivatitis	Dental care
286	Old English Sheepdog	6	M	gingivatitis	Dental care
287	Maltese	6	M	gingivatitis	Dental care
288	Pomeranian	6	M	gingivatitis	Dental care
289	Maltese	6	F	gingivatitis	Dental care
290	Maltese	6	M	gingivatitis	Dental care
291	Maltese	6	M	gingivatitis	Dental care
292	Mixed	6	M	gingivatitis	Dental care
293	Maltese	6	M	gingivatitis	Dental care
294	Poodle	6	M	gingivatitis	Dental care
295	Yorkshire Terrier	6	M	gingivatitis	Dental care
296	Pomeranian	6	M	gingivatitis	Dental care
297	Maltese	6	F	gingivatitis	Dental care
298	Maltese	6	M	gingivatitis	Dental care
299	Pomeranian	6	F	gingivatitis	Dental care
300	Cocker Spaniel	6	M	gingivatitis	Dental care
301	Maltese	7	M	gingivatitis	Dental care
302	Maltese	7	M	gingivatitis	Dental care
303	Maltese	7	M	gingivatitis	Dental care
304	Mixed	7	M	gingivatitis	Dental care
305	Poodle	7	M	gingivatitis	Dental care
306	spitz	7	M	gingivatitis	Dental care
307	Poodle	7	M	gingivatitis	Dental care
308	Yorkshire Terrier	7	F	gingivatitis	Dental care
309	Pekingese	7	M	gingivatitis	Dental care
310	unknown	7	M	gingivatitis	Dental care
311	Maltese	7	M	gingivatitis	Dental care
312	Mixed	7	F	gingivatitis	Dental care
313	Maltese	7	M	gingivatitis	Dental care
314	Yorkshire Terrier	7	F	gingivatitis	Dental care
315	Maltese	7	M	gingivatitis	Dental care
316	Maltese	8	M	gingivatitis	Dental care
317	Maltese	8	M	gingivatitis	Dental care
318	Cocker Spaniel	8	M	gingivatitis	Dental care
319	Poodle	8	M	gingivatitis	Dental care
320	Maltese	8	M	gingivatitis	Dental care
321	Poodle	8	M	gingivatitis	Dental care
322	spitz	8	F	gingivatitis	Dental care
323	Yorkshire Terrier	8	M	gingivatitis	Dental care
324	Maltese	8	F	gingivatitis	Dental care
325	Yorkshire Terrier	8	M	gingivatitis	Dental care
326	Maltese	8	M	gingivatitis	Dental care
327	Yorkshire Terrier	8	M	gingivatitis	Dental care
328	Yorkshire Terrier	8	M	gingivatitis	Dental care
329	Shih Tzu	8	M	gingivatitis	Dental care
330	Shih Tzu	8	M	gingivatitis	Dental care
331	Maltese	8	0	gingivatitis	Dental care
332	Maltese	9	M	gingivatitis	Dental care
333	Maltese	9	M	gingivatitis	Dental care
334	Pomeranian	9	M	gingivatitis	Dental care
335	Pomeranian	9	M	gingivatitis	Dental care
336	Mixed	9	M	gingivatitis	Dental care
337	Yorkshire Terrier	9	M	gingivatitis	Dental care
338	Yorkshire Terrier	9	M	gingivatitis	Dental care
339	Yorkshire Terrier	9	M	gingivatitis	Dental care
340	Maltese	9	M	gingivatitis	Dental care
341	Maltese	9	M	gingivatitis	Dental care
342	Poodle	9	M	gingivatitis	Dental care
343	Maltese	9	M	gingivatitis	Dental care
344	Maltese	9	M	gingivatitis	Dental care
345	Pomeranian	9	M	gingivatitis	Dental care
346	Maltese	9	M	gingivatitis	Dental care
347	Yorkshire Terrier	9	M	gingivatitis	Dental care
348	Mixed	12	M	gingivatitis	Dental care
349	Pug	14	M	gingivatitis	Dental care
350	Dachshund	14	M	gingivatitis	Dental care
351	Yorkshire Terrier	14	M	gingivatitis	Dental care
352	Cocker Spaniel	15	M	gingivatitis	Dental care
353	Shih Tzu	16	M	gingivatitis	Dental care
354	Shih Tzu	unknown	F	gingivatitis	Dental care
355	Pomeranian	2	M	gingivatitis	Dental care
356	Yorkshire Terrier	2	M	gingivatitis	Dental care
357	Pomeranian	2	M	gingivatitis	Dental care
358	Chihuahua	3	M	gingivatitis	Dental care
359	Maltese	3	M	gingivatitis	Dental care
360	Maltese	3	M	gingivatitis	Dental care
361	Boston Terrier	4	M	gingivatitis	Dental care
362	Mixed	4	M	gingivatitis	Dental care
363	Poodle	4	M	gingivatitis	Dental care
364	Yorkshire Terrier	4	M	gingivatitis	Dental care
365	Maltese	4	F	gingivatitis	Dental care
366	Poodle	4	M	gingivatitis	Dental care
367	Poodle	4	M	gingivatitis	Dental care
368	unknown	4	M	gingivatitis	Dental care
369	Maltese	5	M	gingivatitis	Dental care
370	Dachshund	6	M	gingivatitis	Dental care
371	Yorkshire Terrier	6	M	gingivatitis	Dental care
372	Maltese	6	M	gingivatitis	Dental care
373	Mixed	7	M	gingivatitis	Dental care
374	spitz	7	M	gingivatitis	Dental care
375	Maltese	8	M	gingivatitis	Dental care
376	Pekingese	9	M	gingivatitis	Dental care
377	Yorkshire Terrier	10	M	gingivatitis	Dental care
378	Maltese	10	F	gingivatitis	Dental care
379	Poodle	10	F	gingivatitis	Dental care
380	Poodle	10	M	gingivatitis	Dental care
381	Poodle	11	M	gingivatitis	Dental care
382	Yorkshire Terrier	11	F	gingivatitis	Dental care
383	Yorkshire Terrier	12	M	gingivatitis	Dental care
384	Cocker Spaniel	15	M	gingivatitis	Dental care
385	Maltese	unknown	F	gingivatitis	Dental care
386	Maltese	10	F	Periodontal disease	Dental care
387	Maltese	11	F	Periodontal disease	Dental care
388	Shih Tzu	11	M	Periodontal disease	Dental care
389	Maltese	11	M	Periodontal disease	Dental care
390	Maltese	12	F	Periodontal disease	Dental care
391	Maltese	15	M	Periodontal disease	Dental care
392	Mixed	1	M	Periodontal disease	Dental care
393	Coton de Tulear	1	F	Periodontal disease	Dental care
394	Welsh Corgis	1	M	Periodontal disease	Dental care
395	Maltese	1	M	Periodontal disease	Dental care
396	Yorkshire Terrier	2	M	Periodontal disease	Dental care
397	Pomeranian	3	M	Periodontal disease	Dental care
398	Maltese	3	M	Periodontal disease	Dental care
399	Pomeranian	4	F	Periodontal disease	Dental care
400	Chihuahua	4	M	Periodontal disease	Dental care
401	Poodle	5	M	Periodontal disease	Dental care
402	Shih Tzu	6	M	Periodontal disease	Dental care
403	Maltese	6	M	Periodontal disease	Dental care
404	Maltese	7	M	Periodontal disease	Dental care
405	Pomeranian	7	0	Periodontal disease	Dental care
406	Mixed	7	M	Periodontal disease	Dental care
407	Yorkshire Terrier	7	M	Periodontal disease	Dental care
408	Maltese	8	M	Periodontal disease	Dental care
409	Cocker Spaniel	8	M	Periodontal disease	Dental care
410	Yorkshire Terrier	9	M	Periodontal disease	Dental care
411	Maltese	9	M	Periodontal disease	Dental care
412	Mixed	9	F	Periodontal disease	Dental care
413	Lhasa Apso	9	F	Periodontal disease	Dental care
414	Pomeranian	11	M	tooth extraction	Dental care
415	Poodle	14	M	tooth extraction	Dental care
416	Yorkshire Terrier	14	M	tooth extraction	Dental care
417	Yorkshire Terrier	14	M	tooth extraction	Dental care
418	Maltese	15	M	tooth extraction	Dental care
419	Maltese	1	M	tooth extraction	Dental care
420	French Bulldog	1	M	tooth extraction	Dental care
421	Pomeranian	1	M	tooth extraction	Dental care
422	Pomeranian	1	F	tooth extraction	Dental care
423	Yorkshire Terrier	1	M	tooth extraction	Dental care
424	Pomeranian	1	M	tooth extraction	Dental care
425	Bichon Frise	1	F	tooth extraction	Dental care
426	Maltese	1	M	tooth extraction	Dental care
427	Pomeranian	1	M	tooth extraction	Dental care
428	Maltese	1	F	tooth extraction	Dental care
429	Poodle	1	M	tooth extraction	Dental care
430	Maltese	1	M	tooth extraction	Dental care
431	Yorkshire Terrier	1	M	tooth extraction	Dental care
432	Poodle	1	F	tooth extraction	Dental care
433	Chihuahua	1	M	tooth extraction	Dental care
434	Pomeranian	1	M	tooth extraction	Dental care
435	Maltese	1	F	tooth extraction	Dental care
436	Maltese	1	F	tooth extraction	Dental care
437	Poodle	1	F	tooth extraction	Dental care
438	Maltese	1	F	tooth extraction	Dental care
439	Maltese	1	M	tooth extraction	Dental care
440	Pomeranian	1	M	tooth extraction	Dental care
441	Chihuahua	1	M	tooth extraction	Dental care
442	Pomeranian	1	F	tooth extraction	Dental care
443	Maltese	1	F	tooth extraction	Dental care
444	Maltese	1	M	tooth extraction	Dental care
445	Poodle	2	M	tooth extraction	Dental care
446	Mixed	2	M	tooth extraction	Dental care
447	unknown	2	M	tooth extraction	Dental care
448	Pomeranian	2	M	tooth extraction	Dental care
449	Maltese	2	M	tooth extraction	Dental care
450	Pomeranian	2	M	tooth extraction	Dental care
451	Mixed	2	F	tooth extraction	Dental care
452	Bichon Frise	2	M	tooth extraction	Dental care
453	Chihuahua	2	F	tooth extraction	Dental care
454	Poodle	2	M	tooth extraction	Dental care
455	Pomeranian	2	M	tooth extraction	Dental care
456	Maltese	2	F	tooth extraction	Dental care
457	Yorkshire Terrier	2	M	tooth extraction	Dental care
458	Yorkshire Terrier	2	M	tooth extraction	Dental care
459	Welsh Corgis	2	F	tooth extraction	Dental care
460	Maltese	2	M	tooth extraction	Dental care
461	Yorkshire Terrier	2	M	tooth extraction	Dental care
462	Poodle	2	M	tooth extraction	Dental care
463	Maltese	2	M	tooth extraction	Dental care
464	Poodle	2	M	tooth extraction	Dental care
465	Boston Terrier	2	M	tooth extraction	Dental care
466	Maltese	2	F	tooth extraction	Dental care
467	Pomeranian	2	F	tooth extraction	Dental care
468	Poodle	2	M	tooth extraction	Dental care
469	Maltese	2	F	tooth extraction	Dental care
470	Maltese	2	M	tooth extraction	Dental care
471	Maltese	2	M	tooth extraction	Dental care
472	Mixed	2	M	tooth extraction	Dental care
473	Maltese	2	F	tooth extraction	Dental care
474	Maltese	2	F	tooth extraction	Dental care
475	Poodle	2	M	tooth extraction	Dental care
476	Pomeranian	3	M	tooth extraction	Dental care
477	Poodle	3	M	tooth extraction	Dental care
478	Poodle	3	M	tooth extraction	Dental care
479	Yorkshire Terrier	3	F	tooth extraction	Dental care
480	Chihuahua	3	M	tooth extraction	Dental care
481	Maltese	3	F	tooth extraction	Dental care
482	Bichon Frise	3	M	tooth extraction	Dental care
483	Pomeranian	3	M	tooth extraction	Dental care
484	Maltese	4	F	tooth extraction	Dental care
485	Maltese	4	F	tooth extraction	Dental care
486	Maltese	4	F	tooth extraction	Dental care
487	Maltese	5	M	tooth extraction	Dental care
488	Mixed	6	F	tooth extraction	Dental care
489	Maltese	7	M	tooth extraction	Dental care
490	Maltese	7	F	tooth extraction	Dental care
491	Maltese	8	F	tooth extraction	Dental care
492	Maltese	9	M	tooth extraction	Dental care
493	Bichon Frise	1	M	tooth extraction	Dental care
494	Chihuahua	1	M	tooth extraction	Dental care
495	Pomeranian	1	M	tooth extraction	Dental care
496	Pomeranian	1	M	tooth extraction	Dental care
497	Poodle	1	M	tooth extraction	Dental care
498	Poodle	1	M	tooth extraction	Dental care
499	Bichon Frise	1	F	tooth extraction	Dental care
500	Chihuahua	1	F	tooth extraction	Dental care
501	unknown	1	M	tooth extraction	Dental care
502	Pomeranian	1	M	tooth extraction	Dental care
503	Poodle	1	M	tooth extraction	Dental care
504	Poodle	1	M	tooth extraction	Dental care
505	Poodle	1	unknown	tooth extraction	Dental care
506	Maltese	2	M	tooth extraction	Dental care
507	Maltese	2	M	tooth extraction	Dental care
508	Pekingese	2	M	tooth extraction	Dental care
509	Poodle	2	M	tooth extraction	Dental care
510	Pomeranian	2	F	tooth extraction	Dental care
511	Welsh Corgis	2	F	tooth extraction	Dental care
512	Pomeranian	2	M	tooth extraction	Dental care
513	unknown	2	M	tooth extraction	Dental care
514	Schnauzers	2	M	tooth extraction	Dental care
515	Yorkshire Terrier	2	M	tooth extraction	Dental care
516	unknown	3	M	tooth extraction	Dental care
517	Maltese	3	F	tooth extraction	Dental care
518	Mixed	6	F	tooth extraction	Dental care
519	Maltese	8	F	tooth extraction	Dental care
520	Maltese	9	M	tooth extraction	Dental care
521	Maltese	9	M	tooth extraction	Dental care
522	Mixed	9	M	tooth extraction	Dental care
523	Shih Tzu	10	M	tooth extraction	Dental care
524	unknown	12	F	tooth extraction	Dental care
525	Yorkshire Terrier	14	M	tooth extraction	Dental care
526	Poodle	unknown	M	tooth extraction	Dental care
527	Poodle	unknown	M	tooth extraction	Dental care
528	Cocker Spaniel	12	M	tooth fracture	Dental care
529	American Pit Bull Terrier	1	F	tooth fracture	Dental care
530	Maltese	2	M	tooth fracture	Dental care
531	Dachshund	2	M	tooth fracture	Dental care
532	Cocker Spaniel	4	M	tooth fracture	Dental care
533	Pomeranian	7	F	tooth fracture	Dental care
534	Maltese	11	M	tooth fracture	Dental care
535	Jindo Dog	9	M	Developmental anomalies	Developmental anomalies
536	Pomeranian	< 1 y	F	Patent ductus arteriosus	Developmental anomalies
537	Pomeranian	1	M	Patent ductus arteriosus	Developmental anomalies
538	Maltese	1	F	Patent ductus arteriosus	Developmental anomalies
539	Maltese	1	M	Patent ductus arteriosus	Developmental anomalies
540	Maltese	1	F	Patent ductus arteriosus	Developmental anomalies
541	Maltese	1	F	Patent ductus arteriosus	Developmental anomalies
542	Maltese	1	M	Patent ductus arteriosus	Developmental anomalies
543	Maltese	2	M	Portosystemic shunts	Developmental anomalies
544	Mixed	2	M	malformation	Developmental anomalies
545	Maltese	10	M	Anemia	Diseases of the blood or blood-forming organs
546	Maltese	14	M	Anemia	Diseases of the blood or blood-forming organs
547	Bichon Frise	1	F	Anemia	Diseases of the blood or blood-forming organs
548	Pomeranian	2	M	Anemia	Diseases of the blood or blood-forming organs
549	unknown	5	F	Anemia	Diseases of the blood or blood-forming organs
550	Pekingese	7	F	Anemia	Diseases of the blood or blood-forming organs
551	Chihuahua	7	F	Anemia	Diseases of the blood or blood-forming organs
552	Maltese	9	M	Anemia	Diseases of the blood or blood-forming organs
553	Pomeranian	1	F	hypocalcemia	Diseases of the blood or blood-forming organs
554	Poodle	3	M	hypocalcemia	Diseases of the blood or blood-forming organs
555	unknown	1	F	hypoglycemia	Diseases of the blood or blood-forming organs
556	Maltese	9	M	IMT	Diseases of the blood or blood-forming organs
557	Cocker Spaniel	13	M	thrombocytopenia	Diseases of the blood or blood-forming organs
558	Pomeranian	9	F	thrombocytopenia	Diseases of the blood or blood-forming organs
559	Maltese	9	M	thrombocytopenia	Diseases of the blood or blood-forming organs
560	Chow Chow	2	F	Anemia	Diseases of the blood or blood-forming organs
561	Dachshund	9	M	polycythemia	Diseases of the blood or blood-forming organs
562	Maltese	9	M	Neukocytosis	Diseases of the blood or blood-forming organs
563	Pomeranian	2	M	Hypovolemia	Diseases of the blood or blood-forming organs
564	Maltese	5	M	Angioedema	Diseases of the circulatory system
565	Cocker Spaniel	14	F	Arrhythmia	Diseases of the circulatory system
566	Pomeranian	15	M	blood pressure	Diseases of the circulatory system
567	Mixed	18	M	blood pressure	Diseases of the circulatory system
568	Yorkshire Terrier	8	F	blood pressure	Diseases of the circulatory system
569	Yorkshire Terrier	7	M	Bradycardia	Diseases of the circulatory system
570	Maltese	8	F	CPR	Diseases of the circulatory system
571	Maltese	9	M	CPR	Diseases of the circulatory system
572	Maltese	9	F	Cyanosis	Diseases of the circulatory system
573	Pekingese	10	M	heart disease	Diseases of the circulatory system
574	Maltese	10	M	heart disease	Diseases of the circulatory system
575	Pekingese	10	F	heart disease	Diseases of the circulatory system
576	Maltese	10	M	heart disease	Diseases of the circulatory system
577	Maltese	10	M	heart disease	Diseases of the circulatory system
578	Maltese	10	M	heart disease	Diseases of the circulatory system
579	Maltese	10	M	heart disease	Diseases of the circulatory system
580	Schnauzers	10	M	heart disease	Diseases of the circulatory system
581	Maltese	10	F	heart disease	Diseases of the circulatory system
582	Maltese	10	F	heart disease	Diseases of the circulatory system
583	Maltese	11	F	heart disease	Diseases of the circulatory system
584	Maltese	11	M	heart disease	Diseases of the circulatory system
585	Maltese	11	F	heart disease	Diseases of the circulatory system
586	Pekingese	11	M	heart disease	Diseases of the circulatory system
587	Mixed	11	M	heart disease	Diseases of the circulatory system
588	Mixed	11	M	heart disease	Diseases of the circulatory system
589	Maltese	11	M	heart disease	Diseases of the circulatory system
590	Maltese	11	M	heart disease	Diseases of the circulatory system
591	Maltese	11	M	heart disease	Diseases of the circulatory system
592	Cocker Spaniel	11	F	heart disease	Diseases of the circulatory system
593	Maltese	11	M	heart disease	Diseases of the circulatory system
594	Maltese	11	M	heart disease	Diseases of the circulatory system
595	Maltese	11	M	heart disease	Diseases of the circulatory system
596	Shih Tzu	11	M	heart disease	Diseases of the circulatory system
597	Poodle	11	M	heart disease	Diseases of the circulatory system
598	Maltese	12	M	heart disease	Diseases of the circulatory system
599	Maltese	12	M	heart disease	Diseases of the circulatory system
600	Maltese	13	F	heart disease	Diseases of the circulatory system
601	Miniature Pinscher	13	M	heart disease	Diseases of the circulatory system
602	Poodle	13	M	heart disease	Diseases of the circulatory system
603	Maltese	13	M	heart disease	Diseases of the circulatory system
604	Chihuahua	13	M	heart disease	Diseases of the circulatory system
605	Maltese	13	F	heart disease	Diseases of the circulatory system
606	Maltese	13	M	heart disease	Diseases of the circulatory system
607	Maltese	13	M	heart disease	Diseases of the circulatory system
608	Maltese	13	M	heart disease	Diseases of the circulatory system
609	Maltese	13	M	heart disease	Diseases of the circulatory system
610	Poodle	14	M	heart disease	Diseases of the circulatory system
611	Cocker Spaniel	14	F	heart disease	Diseases of the circulatory system
612	Maltese	14	M	heart disease	Diseases of the circulatory system
613	Pekingese	14	M	heart disease	Diseases of the circulatory system
614	Shih Tzu	14	M	heart disease	Diseases of the circulatory system
615	Shih Tzu	14	M	heart disease	Diseases of the circulatory system
616	Shih Tzu	14	M	heart disease	Diseases of the circulatory system
617	Miniature Pinscher	14	M	heart disease	Diseases of the circulatory system
618	Cocker Spaniel	14	M	heart disease	Diseases of the circulatory system
619	Maltese	14	M	heart disease	Diseases of the circulatory system
620	Maltese	14	M	heart disease	Diseases of the circulatory system
621	Maltese	14	F	heart disease	Diseases of the circulatory system
622	Poodle	14	0	heart disease	Diseases of the circulatory system
623	Maltese	14	M	heart disease	Diseases of the circulatory system
624	Schnauzers	14	F	heart disease	Diseases of the circulatory system
625	Schnauzers	14	F	heart disease	Diseases of the circulatory system
626	Cocker Spaniel	14	F	heart disease	Diseases of the circulatory system
627	Maltese	14	M	heart disease	Diseases of the circulatory system
628	Maltese	15	M	heart disease	Diseases of the circulatory system
629	Cocker Spaniel	15	M	heart disease	Diseases of the circulatory system
630	Mixed	15	M	heart disease	Diseases of the circulatory system
631	Mixed	15	M	heart disease	Diseases of the circulatory system
632	Mixed	15	M	heart disease	Diseases of the circulatory system
633	Chihuahua	15	F	heart disease	Diseases of the circulatory system
634	Maltese	15	F	heart disease	Diseases of the circulatory system
635	Miniature Pinscher	15	M	heart disease	Diseases of the circulatory system
636	Shih Tzu	15	M	heart disease	Diseases of the circulatory system
637	Poodle	15	M	heart disease	Diseases of the circulatory system
638	Yorkshire Terrier	15	M	heart disease	Diseases of the circulatory system
639	Maltese	15	M	heart disease	Diseases of the circulatory system
640	Shih Tzu	16	M	heart disease	Diseases of the circulatory system
641	spitz	16	M	heart disease	Diseases of the circulatory system
642	Mixed	19	M	heart disease	Diseases of the circulatory system
643	Maltese	19	M	heart disease	Diseases of the circulatory system
644	Poodle	1	M	heart disease	Diseases of the circulatory system
645	Maltese	1	F	heart disease	Diseases of the circulatory system
646	Maltese	1	M	heart disease	Diseases of the circulatory system
647	Maltese	3	F	heart disease	Diseases of the circulatory system
648	Pomeranian	6	M	heart disease	Diseases of the circulatory system
649	Maltese	6	M	heart disease	Diseases of the circulatory system
650	Poodle	7	M	heart disease	Diseases of the circulatory system
651	Yorkshire Terrier	7	M	heart disease	Diseases of the circulatory system
652	Maltese	7	M	heart disease	Diseases of the circulatory system
653	Maltese	7	M	heart disease	Diseases of the circulatory system
654	Pomeranian	7	M	heart disease	Diseases of the circulatory system
655	Chihuahua	8	M	heart disease	Diseases of the circulatory system
656	Maltese	8	M	heart disease	Diseases of the circulatory system
657	Maltese	8	F	heart disease	Diseases of the circulatory system
658	Maltese	8	M	heart disease	Diseases of the circulatory system
659	Chihuahua	8	M	heart disease	Diseases of the circulatory system
660	Maltese	8	F	heart disease	Diseases of the circulatory system
661	Maltese	9	M	heart disease	Diseases of the circulatory system
662	Maltese	9	M	heart disease	Diseases of the circulatory system
663	Maltese	9	M	heart disease	Diseases of the circulatory system
664	Cocker Spaniel	9	M	heart disease	Diseases of the circulatory system
665	Cocker Spaniel	9	M	heart disease	Diseases of the circulatory system
666	Cocker Spaniel	9	M	heart disease	Diseases of the circulatory system
667	Chihuahua	7	M	heart disease	Diseases of the circulatory system
668	Maltese	13	F	heart disease	Diseases of the circulatory system
669	Maltese	14	M	heart disease	Diseases of the circulatory system
670	Maltese	9	M	heart disease	Diseases of the circulatory system
671	Maltese	9	M	heart disease	Diseases of the circulatory system
672	Maltese	13	F	heart disease	Diseases of the circulatory system
673	Maltese	13	M	heart disease	Diseases of the circulatory system
674	Poodle	13	M	heart disease	Diseases of the circulatory system
675	Maltese	14	M	heart disease	Diseases of the circulatory system
676	spitz	15	M	heart disease	Diseases of the circulatory system
677	Shih Tzu	16	M	heart disease	Diseases of the circulatory system
678	Shih Tzu	16	M	heart disease	Diseases of the circulatory system
679	Maltese	13	F	heart disease	Diseases of the circulatory system
680	Miniature Pinscher	13	M	heart disease	Diseases of the circulatory system
681	Miniature Pinscher	13	M	heart disease	Diseases of the circulatory system
682	Maltese	14	M	heart disease	Diseases of the circulatory system
683	Poodle	14	M	heart disease	Diseases of the circulatory system
684	Shih Tzu	15	M	heart disease	Diseases of the circulatory system
685	Dachshund	16	F	heart disease	Diseases of the circulatory system
686	Chihuahua	16	M	heart disease	Diseases of the circulatory system
687	Mixed	16	M	heart disease	Diseases of the circulatory system
688	Shih Tzu	16	M	heart disease	Diseases of the circulatory system
689	Shih Tzu	unknown	F	heart disease	Diseases of the circulatory system
690	Chihuahua	1	M	heart disease	Diseases of the circulatory system
691	Yorkshire Terrier	15	M	heart disease	Diseases of the circulatory system
692	Poodle	14	0	heart disease	Diseases of the circulatory system
693	Miniature Pinscher	14	M	heart disease	Diseases of the circulatory system
694	Pekingese	14	M	heart disease	Diseases of the circulatory system
695	Maltese	15	M	heart disease	Diseases of the circulatory system
696	Chihuahua	15	F	heart disease	Diseases of the circulatory system
697	Miniature Pinscher	10	M	Lymphadenitis	Diseases of the circulatory system
698	Maltese	11	M	lymphadenopathy	Diseases of the circulatory system
699	Maltese	13	M	Subaortic stenosis	Diseases of the circulatory system
700	Yorkshire Terrier	10	M	tachycardia	Diseases of the circulatory system
701	Pomeranian	10	M	tachycardia	Diseases of the circulatory system
702	Scottish Terrier	15	M	tachycardia	Diseases of the circulatory system
703	Mixed	15	F	tachycardia	Diseases of the circulatory system
704	Maltese	1	M	tachycardia	Diseases of the circulatory system
705	Mixed	2	unknown	tachycardia	Diseases of the circulatory system
706	Poodle	2	M	tachycardia	Diseases of the circulatory system
707	Maltese	2	M	tachycardia	Diseases of the circulatory system
708	Chihuahua	8	M	tachycardia	Diseases of the circulatory system
709	Shih Tzu	12	F	tachycardia	Diseases of the circulatory system
710	Schnauzers	12	M	vasculitis	Diseases of the circulatory system
711	Maltese	10	M	abdominal distension	Diseases of the digestive system
712	Shih Tzu	11	M	abdominal distension	Diseases of the digestive system
713	Shih Tzu	12	F	abdominal distension	Diseases of the digestive system
714	Cocker Spaniel	12	M	abdominal distension	Diseases of the digestive system
715	Poodle	14	F	abdominal distension	Diseases of the digestive system
716	Schnauzers	14	M	abdominal distension	Diseases of the digestive system
717	Yorkshire Terrier	14	M	abdominal distension	Diseases of the digestive system
718	Shih Tzu	15	F	abdominal distension	Diseases of the digestive system
719	Maltese	16	M	abdominal distension	Diseases of the digestive system
720	Poodle	16	M	abdominal distension	Diseases of the digestive system
721	Yorkshire Terrier	16	M	abdominal distension	Diseases of the digestive system
722	Chihuahua	1	M	abdominal distension	Diseases of the digestive system
723	Maltese	1	F	abdominal distension	Diseases of the digestive system
724	Poodle	1	M	abdominal distension	Diseases of the digestive system
725	Pomeranian	2	F	abdominal distension	Diseases of the digestive system
726	Jindo Dog	3	F	abdominal distension	Diseases of the digestive system
727	Cavalier King Charles Spaniel	3	M	abdominal distension	Diseases of the digestive system
728	Pekingese	3	M	abdominal distension	Diseases of the digestive system
729	Golden Retriever	4	M	abdominal distension	Diseases of the digestive system
730	Shih Tzu	6	M	abdominal distension	Diseases of the digestive system
731	Maltese	7	F	abdominal distension	Diseases of the digestive system
732	Maltese	7	M	abdominal distension	Diseases of the digestive system
733	Maltese	8	F	abdominal distension	Diseases of the digestive system
734	Yorkshire Terrier	8	M	abdominal distension	Diseases of the digestive system
735	Shih Tzu	8	M	abdominal distension	Diseases of the digestive system
736	Alaskan Malamute	9	M	abdominal distension	Diseases of the digestive system
737	Maltese	9	M	abdominal distension	Diseases of the digestive system
738	Maltese	9	M	abdominal distension	Diseases of the digestive system
739	Maltese	9	M	abdominal distension	Diseases of the digestive system
740	Maltese	9	M	abdominal distension	Diseases of the digestive system
741	Golden Retriever	1	M	abdominal distension	Diseases of the digestive system
742	Maltese	9	F	abdominal distension	Diseases of the digestive system
743	Cavalier King Charles Spaniel	3	M	abdominal distension	Diseases of the digestive system
744	Shih Tzu	16	F	Abdominal fluid	Diseases of the digestive system
745	Yorkshire Terrier	16	M	Abdominal fluid	Diseases of the digestive system
746	Maltese	4	M	Abdominal fluid	Diseases of the digestive system
747	Yorkshire Terrier	8	F	Abdominal fluid	Diseases of the digestive system
748	Mixed	8	F	Abdominal fluid	Diseases of the digestive system
749	Miniature Pinscher	9	F	Abdominal fluid	Diseases of the digestive system
750	Maltese	13	F	abdominal mass	Diseases of the digestive system
751	Schnauzers	4	M	abdominal mass	Diseases of the digestive system
752	Welsh Corgis	1	M	abdominal mass	Diseases of the digestive system
753	Maltese	10	M	Abdominal pain	Diseases of the digestive system
754	Yorkshire Terrier	10	M	Abdominal pain	Diseases of the digestive system
755	Mixed	10	M	Abdominal pain	Diseases of the digestive system
756	Mixed	15	M	Abdominal pain	Diseases of the digestive system
757	Pomeranian	1	M	Abdominal pain	Diseases of the digestive system
758	Poodle	1	M	Abdominal pain	Diseases of the digestive system
759	Chihuahua	2	M	Abdominal pain	Diseases of the digestive system
760	Shih Tzu	3	F	Abdominal pain	Diseases of the digestive system
761	Yorkshire Terrier	4	M	Abdominal pain	Diseases of the digestive system
762	Shih Tzu	5	M	Abdominal pain	Diseases of the digestive system
763	Maltese	5	F	Abdominal pain	Diseases of the digestive system
764	Maltese	5	F	Abdominal pain	Diseases of the digestive system
765	Mixed	5	F	Abdominal pain	Diseases of the digestive system
766	Poodle	5	M	Abdominal pain	Diseases of the digestive system
767	Pekingese	6	M	Abdominal pain	Diseases of the digestive system
768	Poodle	7	F	Abdominal pain	Diseases of the digestive system
769	Yorkshire Terrier	7	M	Abdominal pain	Diseases of the digestive system
770	Poodle	9	F	Abdominal pain	Diseases of the digestive system
771	Yorkshire Terrier	12	M	anal bleeding	Diseases of the digestive system
772	Poodle	3	M	anal bleeding	Diseases of the digestive system
773	Pomeranian	5	M	anal bleeding	Diseases of the digestive system
774	Shih Tzu	8	M	anal bleeding	Diseases of the digestive system
775	Shih Tzu	6	M	anal breeding	Diseases of the digestive system
776	Yorkshire Terrier	12	M	borborygmus	Diseases of the digestive system
777	unknown	13	F	borborygmus	Diseases of the digestive system
778	Poodle	1	M	borborygmus	Diseases of the digestive system
779	Pomeranian	1	M	borborygmus	Diseases of the digestive system
780	Poodle	1	M	borborygmus	Diseases of the digestive system
781	Pomeranian	2	M	borborygmus	Diseases of the digestive system
782	Poodle	2	M	borborygmus	Diseases of the digestive system
783	Mixed	2	M	borborygmus	Diseases of the digestive system
784	Mixed	3	F	borborygmus	Diseases of the digestive system
785	Pomeranian	3	M	borborygmus	Diseases of the digestive system
786	Poodle	3	M	borborygmus	Diseases of the digestive system
787	Miniature Pinscher	4	F	borborygmus	Diseases of the digestive system
788	Maltese	5	M	borborygmus	Diseases of the digestive system
789	Maltese	8	M	borborygmus	Diseases of the digestive system
790	Pekingese	9	M	borborygmus	Diseases of the digestive system
791	Poodle	9	M	borborygmus	Diseases of the digestive system
792	Poodle	3	M	borborygmus	Diseases of the digestive system
793	pompitz	2	M	borborygmus	Diseases of the digestive system
794	Pomeranian	3	M	borborygmus	Diseases of the digestive system
795	Maltese	10	M	Certain infections of the large intestine	Diseases of the digestive system
796	Cocker Spaniel	10	M	Certain infections of the large intestine	Diseases of the digestive system
797	Maltese	10	F	Certain infections of the large intestine	Diseases of the digestive system
798	Border Collie	< 1 y	M	Certain infections of the large intestine	Diseases of the digestive system
799	Yorkshire Terrier	11	M	Certain infections of the large intestine	Diseases of the digestive system
800	Yorkshire Terrier	12	M	Certain infections of the large intestine	Diseases of the digestive system
801	Yorkshire Terrier	13	M	Certain infections of the large intestine	Diseases of the digestive system
802	Schnauzers	13	M	Certain infections of the large intestine	Diseases of the digestive system
803	Poodle	14	M	Certain infections of the large intestine	Diseases of the digestive system
804	English Setter	14	M	Certain infections of the large intestine	Diseases of the digestive system
805	Mixed	14	M	Certain infections of the large intestine	Diseases of the digestive system
806	Schnauzers	1	F	Certain infections of the large intestine	Diseases of the digestive system
807	Golden Retriever	1	F	Certain infections of the large intestine	Diseases of the digestive system
808	Maltese	1	F	Certain infections of the large intestine	Diseases of the digestive system
809	Olde English Bulldog	1	M	Certain infections of the large intestine	Diseases of the digestive system
810	Pomeranian	1	F	Certain infections of the large intestine	Diseases of the digestive system
811	Mixed	1	F	Certain infections of the large intestine	Diseases of the digestive system
812	Poodle	1	M	Certain infections of the large intestine	Diseases of the digestive system
813	Maltese	1	M	Certain infections of the large intestine	Diseases of the digestive system
814	Dachshund	1	M	Certain infections of the large intestine	Diseases of the digestive system
815	Maltese	1	F	Certain infections of the large intestine	Diseases of the digestive system
816	Mixed	1	M	Certain infections of the large intestine	Diseases of the digestive system
817	Golden Retriever	1	F	Certain infections of the large intestine	Diseases of the digestive system
818	Alaskan Malamute	1	M	Certain infections of the large intestine	Diseases of the digestive system
819	Labrador Retriever	1	F	Certain infections of the large intestine	Diseases of the digestive system
820	Samoyed	1	M	Certain infections of the large intestine	Diseases of the digestive system
821	Maltese	1	M	Certain infections of the large intestine	Diseases of the digestive system
822	Mixed	1	M	Certain infections of the large intestine	Diseases of the digestive system
823	Poodle	1	M	Certain infections of the large intestine	Diseases of the digestive system
824	Mixed	2	M	Certain infections of the large intestine	Diseases of the digestive system
825	Pomeranian	2	M	Certain infections of the large intestine	Diseases of the digestive system
826	Pomeranian	2	M	Certain infections of the large intestine	Diseases of the digestive system
827	Chihuahua	2	M	Certain infections of the large intestine	Diseases of the digestive system
828	Maltese	2	F	Certain infections of the large intestine	Diseases of the digestive system
829	Pomeranian	2	M	Certain infections of the large intestine	Diseases of the digestive system
830	Poodle	2	M	Certain infections of the large intestine	Diseases of the digestive system
831	Poodle	3	M	Certain infections of the large intestine	Diseases of the digestive system
832	Yorkshire Terrier	4	M	Certain infections of the large intestine	Diseases of the digestive system
833	Maltese	4	F	Certain infections of the large intestine	Diseases of the digestive system
834	Chihuahua	4	M	Certain infections of the large intestine	Diseases of the digestive system
835	spitz	6	M	Certain infections of the large intestine	Diseases of the digestive system
836	Mixed	7	M	Certain infections of the large intestine	Diseases of the digestive system
837	Maltese	7	M	Certain infections of the large intestine	Diseases of the digestive system
838	Pomeranian	8	M	Certain infections of the large intestine	Diseases of the digestive system
839	Pekingese	9	M	Certain infections of the large intestine	Diseases of the digestive system
840	Shih Tzu	16	M	Cholangiohepaitits	Diseases of the digestive system
841	Shih Tzu	16	M	cholecystectomy	Diseases of the digestive system
842	Maltese	6	M	cholecystectomy	Diseases of the digestive system
843	Miniature Pinscher	9	F	Cholecystitis	Diseases of the digestive system
844	Pomeranian	4	F	Cholecystitis	Diseases of the digestive system
845	Maltese	15	M	Cholelithiasis	Diseases of the digestive system
846	Pomeranian	< 1 y	M	Constipation	Diseases of the digestive system
847	Maltese	12	F	Constipation	Diseases of the digestive system
848	Bichon Frise	12	M	Constipation	Diseases of the digestive system
849	Bichon Frise	13	M	Constipation	Diseases of the digestive system
850	Shih Tzu	14	M	Constipation	Diseases of the digestive system
851	Maltese	1	F	Constipation	Diseases of the digestive system
852	Coton de Tulear	1	F	Constipation	Diseases of the digestive system
853	Poodle	1	F	Constipation	Diseases of the digestive system
854	Olde English Bulldog	1	F	Constipation	Diseases of the digestive system
855	Shih Tzu	2	M	Constipation	Diseases of the digestive system
856	Maltese	2	M	Constipation	Diseases of the digestive system
857	Maltese	4	M	Constipation	Diseases of the digestive system
858	Maltese	6	M	Constipation	Diseases of the digestive system
859	Yorkshire Terrier	8	M	Constipation	Diseases of the digestive system
860	Pekingese	8	M	Constipation	Diseases of the digestive system
861	American Pit Bull Terrier	1	F	Constipation	Diseases of the digestive system
862	Poodle	9	F	Constipation	Diseases of the digestive system
863	unknown	unknown	0	Constipation	Diseases of the digestive system
864	Mixed	1	M	diaphragmatic hernia	Diseases of the digestive system
865	Mixed	1	F	diaphragmatic hernia	Diseases of the digestive system
866	Chow Chow	2	F	diaphragmatic hernia	Diseases of the digestive system
867	Jindo Dog	8	M	diaphragmatic hernia	Diseases of the digestive system
868	Mixed	< 1 y	M	diarrhea	Diseases of the digestive system
869	Beagle	< 1 y	F	diarrhea	Diseases of the digestive system
870	spitz	< 1 y	M	diarrhea	Diseases of the digestive system
871	Jindo Dog	< 1 y	M	diarrhea	Diseases of the digestive system
872	Maltese	< 1 y	F	diarrhea	Diseases of the digestive system
873	Maltese	10	F	diarrhea	Diseases of the digestive system
874	Poodle	10	M	diarrhea	Diseases of the digestive system
875	Poodle	10	M	diarrhea	Diseases of the digestive system
876	Maltese	10	F	diarrhea	Diseases of the digestive system
877	Maltese	10	M	diarrhea	Diseases of the digestive system
878	Maltese	10	M	diarrhea	Diseases of the digestive system
879	Cocker Spaniel	10	M	diarrhea	Diseases of the digestive system
880	Mixed	< 1 y	M	diarrhea	Diseases of the digestive system
881	Mixed	< 1 y	F	diarrhea	Diseases of the digestive system
882	Chihuahua	< 1 y	0	diarrhea	Diseases of the digestive system
883	Welsh Corgis	< 1 y	M	diarrhea	Diseases of the digestive system
884	Poodle	< 1 y	M	diarrhea	Diseases of the digestive system
885	Chow Chow	< 1 y	F	diarrhea	Diseases of the digestive system
886	Cocker Spaniel	< 1 y	M	diarrhea	Diseases of the digestive system
887	Shiba Inu	< 1 y	F	diarrhea	Diseases of the digestive system
888	Jindo Dog	< 1 y	M	diarrhea	Diseases of the digestive system
889	Bichon Frise	< 1 y	F	diarrhea	Diseases of the digestive system
890	Yorkshire Terrier	11	M	diarrhea	Diseases of the digestive system
891	Poodle	11	M	diarrhea	Diseases of the digestive system
892	Maltese	11	F	diarrhea	Diseases of the digestive system
893	unknown	11	0	diarrhea	Diseases of the digestive system
894	Yorkshire Terrier	11	F	diarrhea	Diseases of the digestive system
895	Maltese	11	M	diarrhea	Diseases of the digestive system
896	Pomeranian	11	F	diarrhea	Diseases of the digestive system
897	Shih Tzu	11	M	diarrhea	Diseases of the digestive system
898	Maltese	11	M	diarrhea	Diseases of the digestive system
899	Yorkshire Terrier	12	M	diarrhea	Diseases of the digestive system
900	Schnauzers	12	M	diarrhea	Diseases of the digestive system
901	Maltese	12	M	diarrhea	Diseases of the digestive system
902	Pekingese	12	M	diarrhea	Diseases of the digestive system
903	Cocker Spaniel	12	M	diarrhea	Diseases of the digestive system
904	Yorkshire Terrier	12	M	diarrhea	Diseases of the digestive system
905	Maltese	12	M	diarrhea	Diseases of the digestive system
906	Pekingese	12	M	diarrhea	Diseases of the digestive system
907	Shih Tzu	12	M	diarrhea	Diseases of the digestive system
908	Miniature Pinscher	12	M	diarrhea	Diseases of the digestive system
909	Cocker Spaniel	13	M	diarrhea	Diseases of the digestive system
910	Poodle	13	M	diarrhea	Diseases of the digestive system
911	Maltese	13	M	diarrhea	Diseases of the digestive system
912	Pekingese	13	F	diarrhea	Diseases of the digestive system
913	Maltese	13	M	diarrhea	Diseases of the digestive system
914	Shih Tzu	14	M	diarrhea	Diseases of the digestive system
915	Maltese	14	M	diarrhea	Diseases of the digestive system
916	Yorkshire Terrier	14	M	diarrhea	Diseases of the digestive system
917	Cocker Spaniel	14	F	diarrhea	Diseases of the digestive system
918	Shih Tzu	14	F	diarrhea	Diseases of the digestive system
919	Poodle	14	M	diarrhea	Diseases of the digestive system
920	English Setter	14	M	diarrhea	Diseases of the digestive system
921	Schnauzers	14	M	diarrhea	Diseases of the digestive system
922	Maltese	14	M	diarrhea	Diseases of the digestive system
923	Maltese	14	F	diarrhea	Diseases of the digestive system
924	Maltese	14	F	diarrhea	Diseases of the digestive system
925	Maltese	15	M	diarrhea	Diseases of the digestive system
926	Maltese	15	M	diarrhea	Diseases of the digestive system
927	Dachshund	15	M	diarrhea	Diseases of the digestive system
928	Chihuahua	15	M	diarrhea	Diseases of the digestive system
929	Shih Tzu	16	F	diarrhea	Diseases of the digestive system
930	Shih Tzu	16	0	diarrhea	Diseases of the digestive system
931	Yorkshire Terrier	16	M	diarrhea	Diseases of the digestive system
932	Shih Tzu	16	M	diarrhea	Diseases of the digestive system
933	Yorkshire Terrier	17	M	diarrhea	Diseases of the digestive system
934	Poodle	18	M	diarrhea	Diseases of the digestive system
935	Yorkshire Terrier	19	M	diarrhea	Diseases of the digestive system
936	Chihuahua	1	F	diarrhea	Diseases of the digestive system
937	Welsh Corgis	1	M	diarrhea	Diseases of the digestive system
938	Maltese	1	M	diarrhea	Diseases of the digestive system
939	Maltese	1	F	diarrhea	Diseases of the digestive system
940	Welsh Corgis	1	M	diarrhea	Diseases of the digestive system
941	Pomeranian	1	M	diarrhea	Diseases of the digestive system
942	Mixed	1	M	diarrhea	Diseases of the digestive system
943	Poodle	1	M	diarrhea	Diseases of the digestive system
944	unknown	1	F	diarrhea	Diseases of the digestive system
945	Shih Tzu	1	M	diarrhea	Diseases of the digestive system
946	Maltese	1	F	diarrhea	Diseases of the digestive system
947	American Bully	1	M	diarrhea	Diseases of the digestive system
948	Poodle	1	F	diarrhea	Diseases of the digestive system
949	Chihuahua	1	M	diarrhea	Diseases of the digestive system
950	Chihuahua	1	M	diarrhea	Diseases of the digestive system
951	Jindo Dog	1	M	diarrhea	Diseases of the digestive system
952	Shar-Pei	1	M	diarrhea	Diseases of the digestive system
953	Chihuahua	1	M	diarrhea	Diseases of the digestive system
954	Pungsan Dog	1	F	diarrhea	Diseases of the digestive system
955	Chihuahua	1	F	diarrhea	Diseases of the digestive system
956	Chihuahua	1	M	diarrhea	Diseases of the digestive system
957	Pug	1	M	diarrhea	Diseases of the digestive system
958	Mixed	1	M	diarrhea	Diseases of the digestive system
959	Maltese	1	M	diarrhea	Diseases of the digestive system
960	Bichon Frise	1	F	diarrhea	Diseases of the digestive system
961	Mixed	1	M	diarrhea	Diseases of the digestive system
962	Jindo Dog	1	F	diarrhea	Diseases of the digestive system
963	Welsh Corgis	1	M	diarrhea	Diseases of the digestive system
964	Maltese	1	F	diarrhea	Diseases of the digestive system
965	Pomeranian	1	M	diarrhea	Diseases of the digestive system
966	Maltese	1	M	diarrhea	Diseases of the digestive system
967	Maltese	1	M	diarrhea	Diseases of the digestive system
968	Maltese	1	F	diarrhea	Diseases of the digestive system
969	Poodle	1	M	diarrhea	Diseases of the digestive system
970	Mixed	1	M	diarrhea	Diseases of the digestive system
971	American Bulldog	1	M	diarrhea	Diseases of the digestive system
972	French Bulldog	1	M	diarrhea	Diseases of the digestive system
973	Golden Retriever	1	F	diarrhea	Diseases of the digestive system
974	Labrador Retriever	1	F	diarrhea	Diseases of the digestive system
975	Jindo Dog	1	M	diarrhea	Diseases of the digestive system
976	Border Collie	1	M	diarrhea	Diseases of the digestive system
977	Mixed	1	M	diarrhea	Diseases of the digestive system
978	unknown	1	M	diarrhea	Diseases of the digestive system
979	Miniature Pinscher	1	F	diarrhea	Diseases of the digestive system
980	Poodle	1	M	diarrhea	Diseases of the digestive system
981	Jindo Dog	1	M	diarrhea	Diseases of the digestive system
982	spitz	1	M	diarrhea	Diseases of the digestive system
983	Dachshund	1	F	diarrhea	Diseases of the digestive system
984	Pungsan Dog	1	M	diarrhea	Diseases of the digestive system
985	Mixed	1	M	diarrhea	Diseases of the digestive system
986	Poodle	1	F	diarrhea	Diseases of the digestive system
987	Shih Tzu	1	M	diarrhea	Diseases of the digestive system
988	Shiba Inu	1	M	diarrhea	Diseases of the digestive system
989	Cocker Spaniel	1	M	diarrhea	Diseases of the digestive system
990	Pomeranian	1	M	diarrhea	Diseases of the digestive system
991	Maltese	1	F	diarrhea	Diseases of the digestive system
992	Poodle	1	M	diarrhea	Diseases of the digestive system
993	Poodle	1	F	diarrhea	Diseases of the digestive system
994	Poodle	1	F	diarrhea	Diseases of the digestive system
995	Maltese	1	M	diarrhea	Diseases of the digestive system
996	Maltese	1	M	diarrhea	Diseases of the digestive system
997	Poodle	1	F	diarrhea	Diseases of the digestive system
998	Maltese	1	F	diarrhea	Diseases of the digestive system
999	Pomeranian	1	F	diarrhea	Diseases of the digestive system
1000	Bichon Frise	1	F	diarrhea	Diseases of the digestive system
1001	Maltese	1	M	diarrhea	Diseases of the digestive system
1002	Pomeranian	1	F	diarrhea	Diseases of the digestive system
1003	Mixed	1	M	diarrhea	Diseases of the digestive system
1004	Welsh Corgis	1	F	diarrhea	Diseases of the digestive system
1005	Pomeranian	1	M	diarrhea	Diseases of the digestive system
1006	Poodle	1	M	diarrhea	Diseases of the digestive system
1007	Bichon Frise	1	M	diarrhea	Diseases of the digestive system
1008	Cocker Spaniel	1	F	diarrhea	Diseases of the digestive system
1009	Yorkshire Terrier	1	M	diarrhea	Diseases of the digestive system
1010	Alaskan Malamute	1	M	diarrhea	Diseases of the digestive system
1011	Alaskan Malamute	1	F	diarrhea	Diseases of the digestive system
1012	Maltese	1	F	diarrhea	Diseases of the digestive system
1013	Maltese	1	F	diarrhea	Diseases of the digestive system
1014	Bichon Frise	1	F	diarrhea	Diseases of the digestive system
1015	Mixed	1	F	diarrhea	Diseases of the digestive system
1016	Mixed	1	F	diarrhea	Diseases of the digestive system
1017	Pomeranian	1	F	diarrhea	Diseases of the digestive system
1018	Pug	1	M	diarrhea	Diseases of the digestive system
1019	Bichon Frise	1	F	diarrhea	Diseases of the digestive system
1020	Bichon Frise	1	F	diarrhea	Diseases of the digestive system
1021	Pekingese	1	M	diarrhea	Diseases of the digestive system
1022	Poodle	1	M	diarrhea	Diseases of the digestive system
1023	Poodle	1	M	diarrhea	Diseases of the digestive system
1024	Maltese	1	F	diarrhea	Diseases of the digestive system
1025	Pomeranian	1	F	diarrhea	Diseases of the digestive system
1026	Pomeranian	1	F	diarrhea	Diseases of the digestive system
1027	Poodle	1	F	diarrhea	Diseases of the digestive system
1028	Maltese	1	F	diarrhea	Diseases of the digestive system
1029	Poodle	1	M	diarrhea	Diseases of the digestive system
1030	Pungsan Dog	1	M	diarrhea	Diseases of the digestive system
1031	English bulldog	1	F	diarrhea	Diseases of the digestive system
1032	Olde English Bulldog	1	F	diarrhea	Diseases of the digestive system
1033	Mixed	1	F	diarrhea	Diseases of the digestive system
1034	Siberian Husky	1	M	diarrhea	Diseases of the digestive system
1035	Shih Tzu	1	M	diarrhea	Diseases of the digestive system
1036	Coton de Tulear	1	F	diarrhea	Diseases of the digestive system
1037	Poodle	1	F	diarrhea	Diseases of the digestive system
1038	Poodle	1	F	diarrhea	Diseases of the digestive system
1039	Shetland Sheepdog	1	M	diarrhea	Diseases of the digestive system
1040	Maltese	1	F	diarrhea	Diseases of the digestive system
1041	Welsh Corgis	1	F	diarrhea	Diseases of the digestive system
1042	Maltese	1	M	diarrhea	Diseases of the digestive system
1043	Maltese	1	F	diarrhea	Diseases of the digestive system
1044	Maltese	1	M	diarrhea	Diseases of the digestive system
1045	Maltese	1	F	diarrhea	Diseases of the digestive system
1046	PUNGSAN DOG	1	F	diarrhea	Diseases of the digestive system
1047	Mixed	1	M	diarrhea	Diseases of the digestive system
1048	Poodle	1	M	diarrhea	Diseases of the digestive system
1049	Yorkshire Terrier	1	F	diarrhea	Diseases of the digestive system
1050	Chihuahua	1	F	diarrhea	Diseases of the digestive system
1051	Yorkshire Terrier	1	M	diarrhea	Diseases of the digestive system
1052	Bichon Frise	1	M	diarrhea	Diseases of the digestive system
1053	Pointer	1	F	diarrhea	Diseases of the digestive system
1054	Bichon Frise	1	F	diarrhea	Diseases of the digestive system
1055	Cocker Spaniel	1	F	diarrhea	Diseases of the digestive system
1056	Maltese	1	M	diarrhea	Diseases of the digestive system
1057	Bichon Frise	1	F	diarrhea	Diseases of the digestive system
1058	unknown	1	M	diarrhea	Diseases of the digestive system
1059	Golden Retriever	1	F	diarrhea	Diseases of the digestive system
1060	Boston Terrier	1	M	diarrhea	Diseases of the digestive system
1061	Maltese	1	F	diarrhea	Diseases of the digestive system
1062	Welsh Corgis	1	M	diarrhea	Diseases of the digestive system
1063	Dachshund	1	M	diarrhea	Diseases of the digestive system
1064	LABRADOR RETRIEVER	1	M	diarrhea	Diseases of the digestive system
1065	Chihuahua	1	M	diarrhea	Diseases of the digestive system
1066	Pomeranian	1	M	diarrhea	Diseases of the digestive system
1067	unknown	1	F	diarrhea	Diseases of the digestive system
1068	Pomeranian	1	M	diarrhea	Diseases of the digestive system
1069	Maltese	1	F	diarrhea	Diseases of the digestive system
1070	Shih Tzu	1	F	diarrhea	Diseases of the digestive system
1071	Poodle	1	F	diarrhea	Diseases of the digestive system
1072	Boston Terrier	1	F	diarrhea	Diseases of the digestive system
1073	Poodle	1	F	diarrhea	Diseases of the digestive system
1074	Poodle	1	F	diarrhea	Diseases of the digestive system
1075	Bichon Frise	1	M	diarrhea	Diseases of the digestive system
1076	Mixed	1	unknown	diarrhea	Diseases of the digestive system
1077	Poodle	1	F	diarrhea	Diseases of the digestive system
1078	Mixed	1	F	diarrhea	Diseases of the digestive system
1079	Pekingese	1	F	diarrhea	Diseases of the digestive system
1080	Welsh Corgis	1	F	diarrhea	Diseases of the digestive system
1081	Jindo Dog	1	F	diarrhea	Diseases of the digestive system
1082	Maltese	1	M	diarrhea	Diseases of the digestive system
1083	Jindo Dog	1	F	diarrhea	Diseases of the digestive system
1084	Labrador Retriever	1	M	diarrhea	Diseases of the digestive system
1085	Pomeranian	1	M	diarrhea	Diseases of the digestive system
1086	Poodle	1	M	diarrhea	Diseases of the digestive system
1087	Pomeranian	1	F	diarrhea	Diseases of the digestive system
1088	Maltese	1	M	diarrhea	Diseases of the digestive system
1089	Poodle	1	M	diarrhea	Diseases of the digestive system
1090	unknown	1	M	diarrhea	Diseases of the digestive system
1091	Cocker Spaniel	1	M	diarrhea	Diseases of the digestive system
1092	Pomeranian	1	M	diarrhea	Diseases of the digestive system
1093	Bichon Frise	1	M	diarrhea	Diseases of the digestive system
1094	Pomeranian	1	M	diarrhea	Diseases of the digestive system
1095	Pomeranian	1	M	diarrhea	Diseases of the digestive system
1096	Poodle	1	M	diarrhea	Diseases of the digestive system
1097	Chihuahua	1	M	diarrhea	Diseases of the digestive system
1098	Dalmatian	1	F	diarrhea	Diseases of the digestive system
1099	Pomeranian	1	M	diarrhea	Diseases of the digestive system
1100	Pomeranian	1	M	diarrhea	Diseases of the digestive system
1101	Siberian Husky	1	F	diarrhea	Diseases of the digestive system
1102	Mixed	1	F	diarrhea	Diseases of the digestive system
1103	Maltese	1	M	diarrhea	Diseases of the digestive system
1104	Poodle	1	F	diarrhea	Diseases of the digestive system
1105	Poodle	1	M	diarrhea	Diseases of the digestive system
1106	Poodle	1	F	diarrhea	Diseases of the digestive system
1107	Poodle	1	M	diarrhea	Diseases of the digestive system
1108	Poodle	1	M	diarrhea	Diseases of the digestive system
1109	Poodle	1	M	diarrhea	Diseases of the digestive system
1110	Maltese	1	F	diarrhea	Diseases of the digestive system
1111	Mixed	1	M	diarrhea	Diseases of the digestive system
1112	Welsh Corgis	1	M	diarrhea	Diseases of the digestive system
1113	Maltese	1	M	diarrhea	Diseases of the digestive system
1114	Pungsan Dog	1	M	diarrhea	Diseases of the digestive system
1115	Pomeranian	1	F	diarrhea	Diseases of the digestive system
1116	Poodle	1	M	diarrhea	Diseases of the digestive system
1117	Poodle	1	M	diarrhea	Diseases of the digestive system
1118	Jindo Dog	1	M	diarrhea	Diseases of the digestive system
1119	Chow Chow	1	M	diarrhea	Diseases of the digestive system
1120	Maltese	1	F	diarrhea	Diseases of the digestive system
1121	Maltese	1	F	diarrhea	Diseases of the digestive system
1122	Mixed	1	F	diarrhea	Diseases of the digestive system
1123	Pomeranian	1	M	diarrhea	Diseases of the digestive system
1124	Pomeranian	1	M	diarrhea	Diseases of the digestive system
1125	Pomeranian	1	F	diarrhea	Diseases of the digestive system
1126	Mixed	1	F	diarrhea	Diseases of the digestive system
1127	Maltese	1	F	diarrhea	Diseases of the digestive system
1128	Bichon Frise	1	M	diarrhea	Diseases of the digestive system
1129	Maltese	1	M	diarrhea	Diseases of the digestive system
1130	Poodle	1	M	diarrhea	Diseases of the digestive system
1131	Siberian Husky	1	M	diarrhea	Diseases of the digestive system
1132	Maltese	1	M	diarrhea	Diseases of the digestive system
1133	Samoyed	1	M	diarrhea	Diseases of the digestive system
1134	Poodle	1	F	diarrhea	Diseases of the digestive system
1135	Pomeranian	1	F	diarrhea	Diseases of the digestive system
1136	Mixed	1	F	diarrhea	Diseases of the digestive system
1137	Mixed	1	F	diarrhea	Diseases of the digestive system
1138	Cocker Spaniel	1	F	diarrhea	Diseases of the digestive system
1139	Maltese	1	M	diarrhea	Diseases of the digestive system
1140	German Shepherd Dog	1	F	diarrhea	Diseases of the digestive system
1141	Jindo Dog	1	M	diarrhea	Diseases of the digestive system
1142	Alaskan Malamute	1	F	diarrhea	Diseases of the digestive system
1143	Dachshund	1	M	diarrhea	Diseases of the digestive system
1144	Labrador Retriever	1	F	diarrhea	Diseases of the digestive system
1145	Maltese	1	F	diarrhea	Diseases of the digestive system
1146	Poodle	1	F	diarrhea	Diseases of the digestive system
1147	Dachshund	1	M	diarrhea	Diseases of the digestive system
1148	Jindo Dog	1	F	diarrhea	Diseases of the digestive system
1149	Maltese	2	M	diarrhea	Diseases of the digestive system
1150	Poodle	2	F	diarrhea	Diseases of the digestive system
1151	Shih Tzu	2	M	diarrhea	Diseases of the digestive system
1152	Pug	2	F	diarrhea	Diseases of the digestive system
1153	Pekingese	2	M	diarrhea	Diseases of the digestive system
1154	Maltese	2	M	diarrhea	Diseases of the digestive system
1155	Poodle	2	M	diarrhea	Diseases of the digestive system
1156	Pomeranian	2	M	diarrhea	Diseases of the digestive system
1157	Pomeranian	2	M	diarrhea	Diseases of the digestive system
1158	Chihuahua	2	F	diarrhea	Diseases of the digestive system
1159	Labrador Retriever	2	M	diarrhea	Diseases of the digestive system
1160	Maltese	2	F	diarrhea	Diseases of the digestive system
1161	Maltese	2	M	diarrhea	Diseases of the digestive system
1162	Pomeranian	2	M	diarrhea	Diseases of the digestive system
1163	Akita	2	M	diarrhea	Diseases of the digestive system
1164	Chihuahua	2	M	diarrhea	Diseases of the digestive system
1165	Jindo Dog	2	M	diarrhea	Diseases of the digestive system
1166	Labrador Retriever	2	M	diarrhea	Diseases of the digestive system
1167	Labrador Retriever	2	M	diarrhea	Diseases of the digestive system
1168	Mixed	2	F	diarrhea	Diseases of the digestive system
1169	Pomeranian	2	M	diarrhea	Diseases of the digestive system
1170	Poodle	2	F	diarrhea	Diseases of the digestive system
1171	Pomeranian	2	M	diarrhea	Diseases of the digestive system
1172	Akita	2	M	diarrhea	Diseases of the digestive system
1173	Jindo Dog	2	F	diarrhea	Diseases of the digestive system
1174	Poodle	2	M	diarrhea	Diseases of the digestive system
1175	Maltese	2	F	diarrhea	Diseases of the digestive system
1176	unknown	2	F	diarrhea	Diseases of the digestive system
1177	unknown	2	0	diarrhea	Diseases of the digestive system
1178	unknown	2	0	diarrhea	Diseases of the digestive system
1179	unknown	2	0	diarrhea	Diseases of the digestive system
1180	Bichon Frise	2	M	diarrhea	Diseases of the digestive system
1181	Bichon Frise	2	M	diarrhea	Diseases of the digestive system
1182	Maltese	2	M	diarrhea	Diseases of the digestive system
1183	Mixed	2	F	diarrhea	Diseases of the digestive system
1184	unknown	2	M	diarrhea	Diseases of the digestive system
1185	spitz	2	M	diarrhea	Diseases of the digestive system
1186	Maltese	2	M	diarrhea	Diseases of the digestive system
1187	Maltese	2	F	diarrhea	Diseases of the digestive system
1188	Pomeranian	2	M	diarrhea	Diseases of the digestive system
1189	Miniature Pinscher	2	M	diarrhea	Diseases of the digestive system
1190	Miniature Pinscher	2	M	diarrhea	Diseases of the digestive system
1191	Maltese	2	M	diarrhea	Diseases of the digestive system
1192	Pungsan Dog	2	M	diarrhea	Diseases of the digestive system
1193	Mixed	2	M	diarrhea	Diseases of the digestive system
1194	Yorkshire Terrier	2	M	diarrhea	Diseases of the digestive system
1195	Mixed	2	M	diarrhea	Diseases of the digestive system
1196	Golden Retriever	2	F	diarrhea	Diseases of the digestive system
1197	Golden Retriever	2	F	diarrhea	Diseases of the digestive system
1198	Poodle	2	M	diarrhea	Diseases of the digestive system
1199	Poodle	2	M	diarrhea	Diseases of the digestive system
1200	Poodle	2	F	diarrhea	Diseases of the digestive system
1201	Poodle	2	M	diarrhea	Diseases of the digestive system
1202	Chihuahua	2	M	diarrhea	Diseases of the digestive system
1203	Chihuahua	2	F	diarrhea	Diseases of the digestive system
1204	Poodle	2	M	diarrhea	Diseases of the digestive system
1205	Maltese	2	F	diarrhea	Diseases of the digestive system
1206	Poodle	2	M	diarrhea	Diseases of the digestive system
1207	Poodle	2	M	diarrhea	Diseases of the digestive system
1208	Maltese	2	F	diarrhea	Diseases of the digestive system
1209	Pomeranian	2	F	diarrhea	Diseases of the digestive system
1210	Pomeranian	2	F	diarrhea	Diseases of the digestive system
1211	Miniature Pinscher	2	M	diarrhea	Diseases of the digestive system
1212	Jindo Dog	2	M	diarrhea	Diseases of the digestive system
1213	Chihuahua	2	M	diarrhea	Diseases of the digestive system
1214	Chihuahua	2	F	diarrhea	Diseases of the digestive system
1215	Maltese	2	M	diarrhea	Diseases of the digestive system
1216	Chihuahua	2	F	diarrhea	Diseases of the digestive system
1217	Mixed	2	M	diarrhea	Diseases of the digestive system
1218	Dachshund	2	M	diarrhea	Diseases of the digestive system
1219	Poodle	2	M	diarrhea	Diseases of the digestive system
1220	Pomeranian	2	M	diarrhea	Diseases of the digestive system
1221	Mixed	2	F	diarrhea	Diseases of the digestive system
1222	Pomeranian	2	M	diarrhea	Diseases of the digestive system
1223	Cocker Spaniel	2	F	diarrhea	Diseases of the digestive system
1224	Poodle	2	M	diarrhea	Diseases of the digestive system
1225	Maltese	2	F	diarrhea	Diseases of the digestive system
1226	Dachshund	2	M	diarrhea	Diseases of the digestive system
1227	Schnauzers	2	F	diarrhea	Diseases of the digestive system
1228	Poodle	2	M	diarrhea	Diseases of the digestive system
1229	Maltese	2	M	diarrhea	Diseases of the digestive system
1230	Maltese	2	F	diarrhea	Diseases of the digestive system
1231	Shih Tzu	2	M	diarrhea	Diseases of the digestive system
1232	Bichon Frise	2	F	diarrhea	Diseases of the digestive system
1233	Poodle	2	F	diarrhea	Diseases of the digestive system
1234	Pungsan Dog	2	F	diarrhea	Diseases of the digestive system
1235	Miniature Pinscher	2	M	diarrhea	Diseases of the digestive system
1236	Golden Retriever	2	F	diarrhea	Diseases of the digestive system
1237	spitz	2	M	diarrhea	Diseases of the digestive system
1238	Poodle	2	M	diarrhea	Diseases of the digestive system
1239	Pomeranian	2	F	diarrhea	Diseases of the digestive system
1240	Maltese	2	F	diarrhea	Diseases of the digestive system
1241	Poodle	2	F	diarrhea	Diseases of the digestive system
1242	Pomeranian	2	F	diarrhea	Diseases of the digestive system
1243	Maltese	2	M	diarrhea	Diseases of the digestive system
1244	Poodle	2	M	diarrhea	Diseases of the digestive system
1245	Cocker Spaniel	2	M	diarrhea	Diseases of the digestive system
1246	Pomeranian	2	M	diarrhea	Diseases of the digestive system
1247	Poodle	2	M	diarrhea	Diseases of the digestive system
1248	Poodle	2	M	diarrhea	Diseases of the digestive system
1249	Poodle	2	M	diarrhea	Diseases of the digestive system
1250	Miniature Pinscher	2	M	diarrhea	Diseases of the digestive system
1251	Maltese	2	M	diarrhea	Diseases of the digestive system
1252	Olde English Bulldog	2	M	diarrhea	Diseases of the digestive system
1253	Schnauzers	2	M	diarrhea	Diseases of the digestive system
1254	Olde English Bulldog	2	M	diarrhea	Diseases of the digestive system
1255	spitz	2	M	diarrhea	Diseases of the digestive system
1256	Poodle	2	M	diarrhea	Diseases of the digestive system
1257	Pomeranian	2	F	diarrhea	Diseases of the digestive system
1258	Mixed	2	M	diarrhea	Diseases of the digestive system
1259	Poodle	2	M	diarrhea	Diseases of the digestive system
1260	Maltese	2	F	diarrhea	Diseases of the digestive system
1261	Pomeranian	2	M	diarrhea	Diseases of the digestive system
1262	Shih Tzu	2	M	diarrhea	Diseases of the digestive system
1263	Maltese	2	F	diarrhea	Diseases of the digestive system
1264	Maltese	2	F	diarrhea	Diseases of the digestive system
1265	Pomeranian	2	F	diarrhea	Diseases of the digestive system
1266	Miniature Pinscher	2	M	diarrhea	Diseases of the digestive system
1267	Labrador Retriever	2	M	diarrhea	Diseases of the digestive system
1268	Pomeranian	2	M	diarrhea	Diseases of the digestive system
1269	Shih Tzu	2	F	diarrhea	Diseases of the digestive system
1270	Mixed	2	F	diarrhea	Diseases of the digestive system
1271	Maltese	2	M	diarrhea	Diseases of the digestive system
1272	Poodle	2	F	diarrhea	Diseases of the digestive system
1273	Welsh Corgis	2	F	diarrhea	Diseases of the digestive system
1274	Poodle	2	M	diarrhea	Diseases of the digestive system
1275	Siberian Husky	2	F	diarrhea	Diseases of the digestive system
1276	Maltese	2	F	diarrhea	Diseases of the digestive system
1277	Maltese	2	F	diarrhea	Diseases of the digestive system
1278	Poodle	3	M	diarrhea	Diseases of the digestive system
1279	Poodle	3	M	diarrhea	Diseases of the digestive system
1280	Shih Tzu	3	F	diarrhea	Diseases of the digestive system
1281	Dachshund	3	M	diarrhea	Diseases of the digestive system
1282	Poodle	3	M	diarrhea	Diseases of the digestive system
1283	Shih Tzu	3	F	diarrhea	Diseases of the digestive system
1284	Mixed	3	M	diarrhea	Diseases of the digestive system
1285	Mixed	3	F	diarrhea	Diseases of the digestive system
1286	Poodle	3	M	diarrhea	Diseases of the digestive system
1287	Poodle	3	M	diarrhea	Diseases of the digestive system
1288	Chihuahua	3	M	diarrhea	Diseases of the digestive system
1289	Maltese	3	F	diarrhea	Diseases of the digestive system
1290	Poodle	3	M	diarrhea	Diseases of the digestive system
1291	Poodle	3	M	diarrhea	Diseases of the digestive system
1292	Poodle	3	M	diarrhea	Diseases of the digestive system
1293	Maltese	3	M	diarrhea	Diseases of the digestive system
1294	Yorkshire Terrier	3	F	diarrhea	Diseases of the digestive system
1295	Golden Retriever	3	M	diarrhea	Diseases of the digestive system
1296	Poodle	3	M	diarrhea	Diseases of the digestive system
1297	Poodle	3	F	diarrhea	Diseases of the digestive system
1298	Pomeranian	3	F	diarrhea	Diseases of the digestive system
1299	Maltese	3	M	diarrhea	Diseases of the digestive system
1300	Maltese	3	F	diarrhea	Diseases of the digestive system
1301	Maltese	3	M	diarrhea	Diseases of the digestive system
1302	Maltese	3	M	diarrhea	Diseases of the digestive system
1303	Labrador Retriever	3	M	diarrhea	Diseases of the digestive system
1304	Boston Terrier	3	M	diarrhea	Diseases of the digestive system
1305	Pomeranian	3	M	diarrhea	Diseases of the digestive system
1306	Pomeranian	3	M	diarrhea	Diseases of the digestive system
1307	Beagle	3	F	diarrhea	Diseases of the digestive system
1308	unknown	3	M	diarrhea	Diseases of the digestive system
1309	Chihuahua	3	F	diarrhea	Diseases of the digestive system
1310	Poodle	3	M	diarrhea	Diseases of the digestive system
1311	Miniature Pinscher	3	F	diarrhea	Diseases of the digestive system
1312	Dachshund	3	M	diarrhea	Diseases of the digestive system
1313	Pomeranian	3	M	diarrhea	Diseases of the digestive system
1314	Pomeranian	3	M	diarrhea	Diseases of the digestive system
1315	Chihuahua	3	F	diarrhea	Diseases of the digestive system
1316	Poodle	3	F	diarrhea	Diseases of the digestive system
1317	Shih Tzu	3	F	diarrhea	Diseases of the digestive system
1318	Poodle	3	F	diarrhea	Diseases of the digestive system
1319	Poodle	3	M	diarrhea	Diseases of the digestive system
1320	Yorkshire Terrier	3	F	diarrhea	Diseases of the digestive system
1321	Yorkshire Terrier	3	F	diarrhea	Diseases of the digestive system
1322	Poodle	3	M	diarrhea	Diseases of the digestive system
1323	spitz	3	M	diarrhea	Diseases of the digestive system
1324	Yorkshire Terrier	3	M	diarrhea	Diseases of the digestive system
1325	Mixed	3	F	diarrhea	Diseases of the digestive system
1326	Mixed	3	F	diarrhea	Diseases of the digestive system
1327	Poodle	3	F	diarrhea	Diseases of the digestive system
1328	Poodle	3	F	diarrhea	Diseases of the digestive system
1329	Chihuahua	3	F	diarrhea	Diseases of the digestive system
1330	Maltese	3	F	diarrhea	Diseases of the digestive system
1331	Pomeranian	3	M	diarrhea	Diseases of the digestive system
1332	Poodle	3	F	diarrhea	Diseases of the digestive system
1333	Poodle	3	F	diarrhea	Diseases of the digestive system
1334	Pomeranian	3	M	diarrhea	Diseases of the digestive system
1335	Poodle	3	M	diarrhea	Diseases of the digestive system
1336	Maltese	3	M	diarrhea	Diseases of the digestive system
1337	Pomeranian	3	F	diarrhea	Diseases of the digestive system
1338	Pomeranian	3	F	diarrhea	Diseases of the digestive system
1339	Pomeranian	3	F	diarrhea	Diseases of the digestive system
1340	Pomeranian	3	F	diarrhea	Diseases of the digestive system
1341	Maltese	3	F	diarrhea	Diseases of the digestive system
1342	Beagle	3	F	diarrhea	Diseases of the digestive system
1343	Poodle	4	M	diarrhea	Diseases of the digestive system
1344	Yorkshire Terrier	4	F	diarrhea	Diseases of the digestive system
1345	spitz	4	F	diarrhea	Diseases of the digestive system
1346	spitz	4	F	diarrhea	Diseases of the digestive system
1347	Poodle	4	M	diarrhea	Diseases of the digestive system
1348	Poodle	4	M	diarrhea	Diseases of the digestive system
1349	Poodle	4	M	diarrhea	Diseases of the digestive system
1350	Yorkshire Terrier	4	M	diarrhea	Diseases of the digestive system
1351	Yorkshire Terrier	4	M	diarrhea	Diseases of the digestive system
1352	spitz	4	M	diarrhea	Diseases of the digestive system
1353	Yorkshire Terrier	4	M	diarrhea	Diseases of the digestive system
1354	Maltese	4	M	diarrhea	Diseases of the digestive system
1355	Pomeranian	4	F	diarrhea	Diseases of the digestive system
1356	Poodle	4	F	diarrhea	Diseases of the digestive system
1357	Chihuahua	4	M	diarrhea	Diseases of the digestive system
1358	Pomeranian	4	F	diarrhea	Diseases of the digestive system
1359	Mixed	4	M	diarrhea	Diseases of the digestive system
1360	Mixed	4	M	diarrhea	Diseases of the digestive system
1361	Poodle	4	M	diarrhea	Diseases of the digestive system
1362	Jindo Dog	4	F	diarrhea	Diseases of the digestive system
1363	Poodle	4	F	diarrhea	Diseases of the digestive system
1364	spitz	4	M	diarrhea	Diseases of the digestive system
1365	Poodle	4	M	diarrhea	Diseases of the digestive system
1366	Maltese	4	M	diarrhea	Diseases of the digestive system
1367	unknown	4	M	diarrhea	Diseases of the digestive system
1368	Poodle	4	M	diarrhea	Diseases of the digestive system
1369	Shih Tzu	4	M	diarrhea	Diseases of the digestive system
1370	Yorkshire Terrier	4	M	diarrhea	Diseases of the digestive system
1371	Maltese	4	M	diarrhea	Diseases of the digestive system
1372	Poodle	4	M	diarrhea	Diseases of the digestive system
1373	Miniature Pinscher	4	F	diarrhea	Diseases of the digestive system
1374	Poodle	4	F	diarrhea	Diseases of the digestive system
1375	Maltese	4	F	diarrhea	Diseases of the digestive system
1376	Chihuahua	4	M	diarrhea	Diseases of the digestive system
1377	Pomeranian	4	M	diarrhea	Diseases of the digestive system
1378	Poodle	4	F	diarrhea	Diseases of the digestive system
1379	Poodle	4	F	diarrhea	Diseases of the digestive system
1380	Italian Greyhound	4	M	diarrhea	Diseases of the digestive system
1381	Maltese	5	M	diarrhea	Diseases of the digestive system
1382	Maltese	5	F	diarrhea	Diseases of the digestive system
1383	Shih Tzu	5	M	diarrhea	Diseases of the digestive system
1384	Maltese	5	M	diarrhea	Diseases of the digestive system
1385	Maltese	5	M	diarrhea	Diseases of the digestive system
1386	Pekingese	5	M	diarrhea	Diseases of the digestive system
1387	Poodle	5	M	diarrhea	Diseases of the digestive system
1388	Poodle	5	M	diarrhea	Diseases of the digestive system
1389	Maltese	5	M	diarrhea	Diseases of the digestive system
1390	Maltese	5	M	diarrhea	Diseases of the digestive system
1391	Pomeranian	5	F	diarrhea	Diseases of the digestive system
1392	Poodle	5	M	diarrhea	Diseases of the digestive system
1393	Shih Tzu	5	F	diarrhea	Diseases of the digestive system
1394	Poodle	5	M	diarrhea	Diseases of the digestive system
1395	Maltese	5	F	diarrhea	Diseases of the digestive system
1396	Poodle	5	M	diarrhea	Diseases of the digestive system
1397	poodle	5	M	diarrhea	Diseases of the digestive system
1398	pompitz	5	M	diarrhea	Diseases of the digestive system
1399	Poodle	5	M	diarrhea	Diseases of the digestive system
1400	Pungsan Dog	5	M	diarrhea	Diseases of the digestive system
1401	Shih Tzu	5	M	diarrhea	Diseases of the digestive system
1402	Maltese	5	M	diarrhea	Diseases of the digestive system
1403	Poodle	5	M	diarrhea	Diseases of the digestive system
1404	Poodle	5	F	diarrhea	Diseases of the digestive system
1405	Chihuahua	5	M	diarrhea	Diseases of the digestive system
1406	Pomeranian	5	F	diarrhea	Diseases of the digestive system
1407	Maltese	5	M	diarrhea	Diseases of the digestive system
1408	Maltese	5	M	diarrhea	Diseases of the digestive system
1409	Maltese	5	F	diarrhea	Diseases of the digestive system
1410	Maltese	5	M	diarrhea	Diseases of the digestive system
1411	Maltese	5	F	diarrhea	Diseases of the digestive system
1412	Pomeranian	5	F	diarrhea	Diseases of the digestive system
1413	Poodle	5	M	diarrhea	Diseases of the digestive system
1414	Mixed	5	F	diarrhea	Diseases of the digestive system
1415	Chihuahua	6	M	diarrhea	Diseases of the digestive system
1416	Maltese	6	M	diarrhea	Diseases of the digestive system
1417	Yorkshire Terrier	6	F	diarrhea	Diseases of the digestive system
1418	Belgian Malinois	6	F	diarrhea	Diseases of the digestive system
1419	Belgian Malinois	6	F	diarrhea	Diseases of the digestive system
1420	Mixed	6	M	diarrhea	Diseases of the digestive system
1421	Shih Tzu	6	M	diarrhea	Diseases of the digestive system
1422	Shih Tzu	6	M	diarrhea	Diseases of the digestive system
1423	Shih Tzu	6	M	diarrhea	Diseases of the digestive system
1424	Maltese	6	M	diarrhea	Diseases of the digestive system
1425	Maltese	6	M	diarrhea	Diseases of the digestive system
1426	Pomeranian	6	F	diarrhea	Diseases of the digestive system
1427	Mixed	6	M	diarrhea	Diseases of the digestive system
1428	Mixed	6	F	diarrhea	Diseases of the digestive system
1429	Mixed	6	M	diarrhea	Diseases of the digestive system
1430	Pekingese	6	F	diarrhea	Diseases of the digestive system
1431	Yorkshire Terrier	6	M	diarrhea	Diseases of the digestive system
1432	Mixed	7	M	diarrhea	Diseases of the digestive system
1433	Poodle	7	M	diarrhea	Diseases of the digestive system
1434	Mixed	7	M	diarrhea	Diseases of the digestive system
1435	Poodle	7	F	diarrhea	Diseases of the digestive system
1436	Shih Tzu	7	M	diarrhea	Diseases of the digestive system
1437	Shih Tzu	7	M	diarrhea	Diseases of the digestive system
1438	Afghan Hound	7	M	diarrhea	Diseases of the digestive system
1439	Pomeranian	7	F	diarrhea	Diseases of the digestive system
1440	Maltese	7	M	diarrhea	Diseases of the digestive system
1441	Maltese	7	M	diarrhea	Diseases of the digestive system
1442	Yorkshire Terrier	7	M	diarrhea	Diseases of the digestive system
1443	Yorkshire Terrier	7	F	diarrhea	Diseases of the digestive system
1444	Yorkshire Terrier	7	F	diarrhea	Diseases of the digestive system
1445	spitz	7	M	diarrhea	Diseases of the digestive system
1446	Maltese	7	M	diarrhea	Diseases of the digestive system
1447	Chihuahua	7	M	diarrhea	Diseases of the digestive system
1448	Poodle	8	M	diarrhea	Diseases of the digestive system
1449	Poodle	8	M	diarrhea	Diseases of the digestive system
1450	Poodle	8	M	diarrhea	Diseases of the digestive system
1451	Poodle	8	M	diarrhea	Diseases of the digestive system
1452	Maltese	8	F	diarrhea	Diseases of the digestive system
1453	Shih Tzu	8	F	diarrhea	Diseases of the digestive system
1454	Cocker Spaniel	8	M	diarrhea	Diseases of the digestive system
1455	Pomeranian	8	F	diarrhea	Diseases of the digestive system
1456	Maltese	8	F	diarrhea	Diseases of the digestive system
1457	Maltese	8	M	diarrhea	Diseases of the digestive system
1458	Shih Tzu	8	M	diarrhea	Diseases of the digestive system
1459	Maltese	8	F	diarrhea	Diseases of the digestive system
1460	Cocker Spaniel	8	M	diarrhea	Diseases of the digestive system
1461	Poodle	8	M	diarrhea	Diseases of the digestive system
1462	Maltese	8	M	diarrhea	Diseases of the digestive system
1463	unknown	8	M	diarrhea	Diseases of the digestive system
1464	unknown	8	M	diarrhea	Diseases of the digestive system
1465	Yorkshire Terrier	8	M	diarrhea	Diseases of the digestive system
1466	Mixed	9	F	diarrhea	Diseases of the digestive system
1467	Maltese	9	M	diarrhea	Diseases of the digestive system
1468	Shih Tzu	9	M	diarrhea	Diseases of the digestive system
1469	Alaskan Malamute	9	M	diarrhea	Diseases of the digestive system
1470	Yorkshire Terrier	9	M	diarrhea	Diseases of the digestive system
1471	Schnauzers	9	F	diarrhea	Diseases of the digestive system
1472	Maltese	9	M	diarrhea	Diseases of the digestive system
1473	Poodle	9	M	diarrhea	Diseases of the digestive system
1474	Maltese	9	M	diarrhea	Diseases of the digestive system
1475	Yorkshire Terrier	9	M	diarrhea	Diseases of the digestive system
1476	Maltese	9	M	diarrhea	Diseases of the digestive system
1477	Maltese	9	M	diarrhea	Diseases of the digestive system
1478	Shih Tzu	9	F	diarrhea	Diseases of the digestive system
1479	Shih Tzu	9	M	diarrhea	Diseases of the digestive system
1480	Maltese	9	M	diarrhea	Diseases of the digestive system
1481	Maltese	9	M	diarrhea	Diseases of the digestive system
1482	Pomeranian	9	M	diarrhea	Diseases of the digestive system
1483	Yorkshire Terrier	9	M	diarrhea	Diseases of the digestive system
1484	Yorkshire Terrier	9	M	diarrhea	Diseases of the digestive system
1485	Maltese	9	M	diarrhea	Diseases of the digestive system
1486	Yorkshire Terrier	10	M	diarrhea	Diseases of the digestive system
1487	Mixed	10	F	diarrhea	Diseases of the digestive system
1488	Poodle	10	M	diarrhea	Diseases of the digestive system
1489	Cocker Spaniel	11	M	diarrhea	Diseases of the digestive system
1490	Dachshund	11	M	diarrhea	Diseases of the digestive system
1491	Poodle	11	M	diarrhea	Diseases of the digestive system
1492	Schnauzers	11	M	diarrhea	Diseases of the digestive system
1493	Shih Tzu	11	M	diarrhea	Diseases of the digestive system
1494	Maltese	12	M	diarrhea	Diseases of the digestive system
1495	Schnauzers	12	F	diarrhea	Diseases of the digestive system
1496	Maltese	12	F	diarrhea	Diseases of the digestive system
1497	Yorkshire Terrier	12	M	diarrhea	Diseases of the digestive system
1498	Poodle	13	M	diarrhea	Diseases of the digestive system
1499	Maltese	14	M	diarrhea	Diseases of the digestive system
1500	Yorkshire Terrier	14	F	diarrhea	Diseases of the digestive system
1501	Maltese	14	M	diarrhea	Diseases of the digestive system
1502	Maltese	14	M	diarrhea	Diseases of the digestive system
1503	Poodle	14	M	diarrhea	Diseases of the digestive system
1504	Yorkshire Terrier	15	M	diarrhea	Diseases of the digestive system
1505	Yorkshire Terrier	16	M	diarrhea	Diseases of the digestive system
1506	Shih Tzu	16	F	diarrhea	Diseases of the digestive system
1507	Mixed	19	M	diarrhea	Diseases of the digestive system
1508	Pomeranian	1	M	diarrhea	Diseases of the digestive system
1509	Maltese	1	unknown	diarrhea	Diseases of the digestive system
1510	Maltese	1	F	diarrhea	Diseases of the digestive system
1511	Yorkshire Terrier	1	F	diarrhea	Diseases of the digestive system
1512	Chihuahua	1	M	diarrhea	Diseases of the digestive system
1513	Pomeranian	1	F	diarrhea	Diseases of the digestive system
1514	Welsh Corgis	1	F	diarrhea	Diseases of the digestive system
1515	Maltese	1	F	diarrhea	Diseases of the digestive system
1516	Maltese	1	F	diarrhea	Diseases of the digestive system
1517	Jindo Dog	1	M	diarrhea	Diseases of the digestive system
1518	Mixed	1	F	diarrhea	Diseases of the digestive system
1519	Mixed	1	M	diarrhea	Diseases of the digestive system
1520	Poodle	1	F	diarrhea	Diseases of the digestive system
1521	Chihuahua	1	M	diarrhea	Diseases of the digestive system
1522	Yorkshire Terrier	1	F	diarrhea	Diseases of the digestive system
1523	Bichon Frise	1	M	diarrhea	Diseases of the digestive system
1524	Shih Tzu	1	M	diarrhea	Diseases of the digestive system
1525	pompitz	1	0	diarrhea	Diseases of the digestive system
1526	Chihuahua	1	M	diarrhea	Diseases of the digestive system
1527	Golden Retriever	1	M	diarrhea	Diseases of the digestive system
1528	Pomeranian	1	M	diarrhea	Diseases of the digestive system
1529	Poodle	1	M	diarrhea	Diseases of the digestive system
1530	unknown	1	unknown	diarrhea	Diseases of the digestive system
1531	Pomeranian	1	M	diarrhea	Diseases of the digestive system
1532	Golden Retriever	1	F	diarrhea	Diseases of the digestive system
1533	Pomeranian	1	M	diarrhea	Diseases of the digestive system
1534	Poodle	1	F	diarrhea	Diseases of the digestive system
1535	Poodle	1	M	diarrhea	Diseases of the digestive system
1536	Maltese	1	M	diarrhea	Diseases of the digestive system
1537	Maltese	1	F	diarrhea	Diseases of the digestive system
1538	Maltese	1	F	diarrhea	Diseases of the digestive system
1539	pompitz	1	M	diarrhea	Diseases of the digestive system
1540	Poodle	1	F	diarrhea	Diseases of the digestive system
1541	Yorkshire Terrier	1	M	diarrhea	Diseases of the digestive system
1542	Yorkshire Terrier	1	M	diarrhea	Diseases of the digestive system
1543	Poodle	1	M	diarrhea	Diseases of the digestive system
1544	Poodle	1	M	diarrhea	Diseases of the digestive system
1545	Shih Tzu	1	F	diarrhea	Diseases of the digestive system
1546	Poodle	1	F	diarrhea	Diseases of the digestive system
1547	Welsh Corgis	1	M	diarrhea	Diseases of the digestive system
1548	Maltese	1	F	diarrhea	Diseases of the digestive system
1549	Maltese	1	F	diarrhea	Diseases of the digestive system
1550	Maltese	1	M	diarrhea	Diseases of the digestive system
1551	Chihuahua	1	M	diarrhea	Diseases of the digestive system
1552	Pungsan Dog	1	M	diarrhea	Diseases of the digestive system
1553	Dachshund	1	F	diarrhea	Diseases of the digestive system
1554	폼피츠	1	F	diarrhea	Diseases of the digestive system
1555	Maltese	1	F	diarrhea	Diseases of the digestive system
1556	Pomeranian	1	M	diarrhea	Diseases of the digestive system
1557	Poodle	1	M	diarrhea	Diseases of the digestive system
1558	Poodle	1	F	diarrhea	Diseases of the digestive system
1559	Bulldog	1	F	diarrhea	Diseases of the digestive system
1560	Maltese	1	M	diarrhea	Diseases of the digestive system
1561	Maltese	1	F	diarrhea	Diseases of the digestive system
1562	French Bulldog	1	M	diarrhea	Diseases of the digestive system
1563	French Bulldog	1	M	diarrhea	Diseases of the digestive system
1564	Jindo Dog	1	F	diarrhea	Diseases of the digestive system
1565	Maltese	1	M	diarrhea	Diseases of the digestive system
1566	Shih Tzu	20	M	diarrhea	Diseases of the digestive system
1567	Poodle	2	F	diarrhea	Diseases of the digestive system
1568	Maltese	2	F	diarrhea	Diseases of the digestive system
1569	Maltese	2	M	diarrhea	Diseases of the digestive system
1570	Maltese	2	M	diarrhea	Diseases of the digestive system
1571	Maltese	2	M	diarrhea	Diseases of the digestive system
1572	Poodle	2	F	diarrhea	Diseases of the digestive system
1573	Akita	2	M	diarrhea	Diseases of the digestive system
1574	Chihuahua	2	F	diarrhea	Diseases of the digestive system
1575	Maltese	2	M	diarrhea	Diseases of the digestive system
1576	Boston Terrier	2	F	diarrhea	Diseases of the digestive system
1577	Mixed	2	M	diarrhea	Diseases of the digestive system
1578	Miniature Pinscher	2	M	diarrhea	Diseases of the digestive system
1579	Bichon Frise	2	F	diarrhea	Diseases of the digestive system
1580	Yorkshire Terrier	2	F	diarrhea	Diseases of the digestive system
1581	Labrador Retriever	2	F	diarrhea	Diseases of the digestive system
1582	Poodle	2	M	diarrhea	Diseases of the digestive system
1583	Maltese	2	F	diarrhea	Diseases of the digestive system
1584	Poodle	2	F	diarrhea	Diseases of the digestive system
1585	Boston Terrier	2	F	diarrhea	Diseases of the digestive system
1586	Poodle	2	F	diarrhea	Diseases of the digestive system
1587	Poodle	2	M	diarrhea	Diseases of the digestive system
1588	Pomeranian	2	M	diarrhea	Diseases of the digestive system
1589	Poodle	2	M	diarrhea	Diseases of the digestive system
1590	Shih Tzu	2	M	diarrhea	Diseases of the digestive system
1591	Poodle	2	M	diarrhea	Diseases of the digestive system
1592	Chow Chow	2	F	diarrhea	Diseases of the digestive system
1593	Maltese	2	F	diarrhea	Diseases of the digestive system
1594	Poodle	2	M	diarrhea	Diseases of the digestive system
1595	Maltese	2	F	diarrhea	Diseases of the digestive system
1596	Labrador Retriever	2	M	diarrhea	Diseases of the digestive system
1597	Maltese	2	M	diarrhea	Diseases of the digestive system
1598	Maltese	3	M	diarrhea	Diseases of the digestive system
1599	Pomeranian	3	M	diarrhea	Diseases of the digestive system
1600	Poodle	3	F	diarrhea	Diseases of the digestive system
1601	Maltese	3	M	diarrhea	Diseases of the digestive system
1602	Jindo Dog	3	M	diarrhea	Diseases of the digestive system
1603	Shih Tzu	3	unknown	diarrhea	Diseases of the digestive system
1604	Labrador Retriever	3	M	diarrhea	Diseases of the digestive system
1605	Poodle	3	M	diarrhea	Diseases of the digestive system
1606	Mixed	3	F	diarrhea	Diseases of the digestive system
1607	Maltese	3	M	diarrhea	Diseases of the digestive system
1608	Maltese	3	F	diarrhea	Diseases of the digestive system
1609	Poodle	3	M	diarrhea	Diseases of the digestive system
1610	Shih Tzu	3	M	diarrhea	Diseases of the digestive system
1611	Shih Tzu	3	F	diarrhea	Diseases of the digestive system
1612	Pomeranian	3	M	diarrhea	Diseases of the digestive system
1613	Maltese	3	F	diarrhea	Diseases of the digestive system
1614	Pomeranian	3	F	diarrhea	Diseases of the digestive system
1615	Yorkshire Terrier	3	F	diarrhea	Diseases of the digestive system
1616	POINTER	3	M	diarrhea	Diseases of the digestive system
1617	Maltese	4	M	diarrhea	Diseases of the digestive system
1618	Mixed	4	M	diarrhea	Diseases of the digestive system
1619	Shih Tzu	4	F	diarrhea	Diseases of the digestive system
1620	Poodle	4	M	diarrhea	Diseases of the digestive system
1621	Poodle	4	M	diarrhea	Diseases of the digestive system
1622	Poodle	4	M	diarrhea	Diseases of the digestive system
1623	Shih Tzu	4	M	diarrhea	Diseases of the digestive system
1624	Poodle	4	M	diarrhea	Diseases of the digestive system
1625	Poodle	4	M	diarrhea	Diseases of the digestive system
1626	Mixed	4	M	diarrhea	Diseases of the digestive system
1627	Pomeranian	4	M	diarrhea	Diseases of the digestive system
1628	Beagle	4	F	diarrhea	Diseases of the digestive system
1629	Shih Tzu	4	M	diarrhea	Diseases of the digestive system
1630	Poodle	4	M	diarrhea	Diseases of the digestive system
1631	Yorkshire Terrier	4	M	diarrhea	Diseases of the digestive system
1632	Maltese	4	F	diarrhea	Diseases of the digestive system
1633	Maltese	4	M	diarrhea	Diseases of the digestive system
1634	Pomeranian	4	F	diarrhea	Diseases of the digestive system
1635	Afghan Hound	4	F	diarrhea	Diseases of the digestive system
1636	Maltese	5	M	diarrhea	Diseases of the digestive system
1637	Maltese	5	M	diarrhea	Diseases of the digestive system
1638	Mixed	5	M	diarrhea	Diseases of the digestive system
1639	Dachshund	5	M	diarrhea	Diseases of the digestive system
1640	Mixed	5	F	diarrhea	Diseases of the digestive system
1641	Maltese	5	F	diarrhea	Diseases of the digestive system
1642	spitz	5	M	diarrhea	Diseases of the digestive system
1643	Yorkshire Terrier	5	M	diarrhea	Diseases of the digestive system
1644	Maltese	5	F	diarrhea	Diseases of the digestive system
1645	Maltese	6	F	diarrhea	Diseases of the digestive system
1646	Pekingese	6	M	diarrhea	Diseases of the digestive system
1647	Afghan Hound	6	M	diarrhea	Diseases of the digestive system
1648	Maltese	6	F	diarrhea	Diseases of the digestive system
1649	Poodle	6	M	diarrhea	Diseases of the digestive system
1650	Maltese	7	M	diarrhea	Diseases of the digestive system
1651	Poodle	7	F	diarrhea	Diseases of the digestive system
1652	Maltese	7	M	diarrhea	Diseases of the digestive system
1653	Shih Tzu	7	F	diarrhea	Diseases of the digestive system
1654	Maltese	7	M	diarrhea	Diseases of the digestive system
1655	spitz	7	F	diarrhea	Diseases of the digestive system
1656	Pomeranian	7	M	diarrhea	Diseases of the digestive system
1657	Chihuahua	7	M	diarrhea	Diseases of the digestive system
1658	unknown	8	M	diarrhea	Diseases of the digestive system
1659	spitz	8	F	diarrhea	Diseases of the digestive system
1660	Yorkshire Terrier	8	M	diarrhea	Diseases of the digestive system
1661	Shih Tzu	8	M	diarrhea	Diseases of the digestive system
1662	Poodle	8	M	diarrhea	Diseases of the digestive system
1663	Maltese	9	F	diarrhea	Diseases of the digestive system
1664	Miniature Pinscher	9	M	diarrhea	Diseases of the digestive system
1665	Poodle	9	M	diarrhea	Diseases of the digestive system
1666	Maltese	9	M	diarrhea	Diseases of the digestive system
1667	Maltese	9	M	diarrhea	Diseases of the digestive system
1668	Shih Tzu	9	M	diarrhea	Diseases of the digestive system
1669	Bulldog	9	M	diarrhea	Diseases of the digestive system
1670	Golden Retriever	unknown	M	diarrhea	Diseases of the digestive system
1671	Jindo Dog	unknown	0	diarrhea	Diseases of the digestive system
1672	Mixed	unknown	F	diarrhea	Diseases of the digestive system
1673	Pomeranian	unknown	M	diarrhea	Diseases of the digestive system
1674	Siberian Husky	unknown	M	diarrhea	Diseases of the digestive system
1675	Maltese	< 1 y	M	diarrhea	Diseases of the digestive system
1676	Poodle	1	M	diarrhea	Diseases of the digestive system
1677	Chow Chow	2	F	diarrhea	Diseases of the digestive system
1678	Miniature Pinscher	4	M	diarrhea	Diseases of the digestive system
1679	Poodle	unknown	M	diarrhea	Diseases of the digestive system
1680	Japanese Chin	1	M	diarrhea	Diseases of the digestive system
1681	Pomeranian	9	F	diarrhea	Diseases of the digestive system
1682	Yorkshire Terrier	11	M	Diseases of liver, unspecified	Diseases of the digestive system
1683	Maltese	12	F	Diseases of liver, unspecified	Diseases of the digestive system
1684	Poodle	13	M	Diseases of liver, unspecified	Diseases of the digestive system
1685	Yorkshire Terrier	13	M	Diseases of liver, unspecified	Diseases of the digestive system
1686	Mixed	14	M	Diseases of liver, unspecified	Diseases of the digestive system
1687	Miniature Pinscher	15	M	Diseases of liver, unspecified	Diseases of the digestive system
1688	Maltese	15	M	Diseases of liver, unspecified	Diseases of the digestive system
1689	Cocker Spaniel	15	M	Diseases of liver, unspecified	Diseases of the digestive system
1690	Welsh Corgis	1	M	Diseases of liver, unspecified	Diseases of the digestive system
1691	Poodle	1	F	Diseases of liver, unspecified	Diseases of the digestive system
1692	Maltese	1	M	Diseases of liver, unspecified	Diseases of the digestive system
1693	Pomeranian	2	F	Diseases of liver, unspecified	Diseases of the digestive system
1694	Jindo Dog	2	F	Diseases of liver, unspecified	Diseases of the digestive system
1695	Poodle	3	M	Diseases of liver, unspecified	Diseases of the digestive system
1696	Shih Tzu	3	F	Diseases of liver, unspecified	Diseases of the digestive system
1697	Shih Tzu	3	M	Diseases of liver, unspecified	Diseases of the digestive system
1698	Mixed	4	M	Diseases of liver, unspecified	Diseases of the digestive system
1699	Chihuahua	4	F	Diseases of liver, unspecified	Diseases of the digestive system
1700	unknown	4	M	Diseases of liver, unspecified	Diseases of the digestive system
1701	Pomeranian	4	F	Diseases of liver, unspecified	Diseases of the digestive system
1702	Mixed	6	M	Diseases of liver, unspecified	Diseases of the digestive system
1703	Shih Tzu	6	M	Diseases of liver, unspecified	Diseases of the digestive system
1704	Shih Tzu	7	M	Diseases of liver, unspecified	Diseases of the digestive system
1705	Maltese	7	M	Diseases of liver, unspecified	Diseases of the digestive system
1706	Yorkshire Terrier	8	M	Diseases of liver, unspecified	Diseases of the digestive system
1707	Maltese	9	F	Diseases of liver, unspecified	Diseases of the digestive system
1708	Maltese	9	M	Diseases of liver, unspecified	Diseases of the digestive system
1709	Dachshund	9	M	Diseases of liver, unspecified	Diseases of the digestive system
1710	Poodle	10	M	Diseases of liver, unspecified	Diseases of the digestive system
1711	Pekingese	13	M	Diseases of liver, unspecified	Diseases of the digestive system
1712	Shih Tzu	14	M	Diseases of liver, unspecified	Diseases of the digestive system
1713	Mixed	16	F	Diseases of liver, unspecified	Diseases of the digestive system
1714	Golden Retriever	4	F	Diseases of liver, unspecified	Diseases of the digestive system
1715	Maltese	4	F	Diseases of liver, unspecified	Diseases of the digestive system
1716	unknown	4	M	Diseases of liver, unspecified	Diseases of the digestive system
1717	Yorkshire Terrier	8	M	Diseases of liver, unspecified	Diseases of the digestive system
1718	Yorkshire Terrier	10	M	enterotomy	Diseases of the digestive system
1719	Poodle	1	M	enterotomy	Diseases of the digestive system
1720	Poodle	1	F	enterotomy	Diseases of the digestive system
1721	Poodle	2	F	enterotomy	Diseases of the digestive system
1722	Pomeranian	2	M	enterotomy	Diseases of the digestive system
1723	Maltese	6	M	enterotomy	Diseases of the digestive system
1724	Maltese	2	M	foreign bodies	Diseases of the digestive system
1725	Maltese	10	F	foreign body ingestion	Diseases of the digestive system
1726	Yorkshire Terrier	10	M	foreign body ingestion	Diseases of the digestive system
1727	Doberman Pinscher	10	M	foreign body ingestion	Diseases of the digestive system
1728	Afghan Hound	10	F	foreign body ingestion	Diseases of the digestive system
1729	Yorkshire Terrier	11	M	foreign body ingestion	Diseases of the digestive system
1730	Maltese	11	M	foreign body ingestion	Diseases of the digestive system
1731	Maltese	11	F	foreign body ingestion	Diseases of the digestive system
1732	Maltese	11	M	foreign body ingestion	Diseases of the digestive system
1733	Maltese	11	M	foreign body ingestion	Diseases of the digestive system
1734	Poodle	11	M	foreign body ingestion	Diseases of the digestive system
1735	Schnauzers	13	M	foreign body ingestion	Diseases of the digestive system
1736	Maltese	13	M	foreign body ingestion	Diseases of the digestive system
1737	Maltese	13	M	foreign body ingestion	Diseases of the digestive system
1738	Cocker Spaniel	14	M	foreign body ingestion	Diseases of the digestive system
1739	Poodle	14	M	foreign body ingestion	Diseases of the digestive system
1740	Schnauzers	14	M	foreign body ingestion	Diseases of the digestive system
1741	Shih Tzu	16	M	foreign body ingestion	Diseases of the digestive system
1742	Maltese	17	M	foreign body ingestion	Diseases of the digestive system
1743	Yorkshire Terrier	18	M	foreign body ingestion	Diseases of the digestive system
1744	Maltese	1	M	foreign body ingestion	Diseases of the digestive system
1745	Maltese	1	M	foreign body ingestion	Diseases of the digestive system
1746	French Bulldog	1	M	foreign body ingestion	Diseases of the digestive system
1747	unknown	1	F	foreign body ingestion	Diseases of the digestive system
1748	Maltese	1	M	foreign body ingestion	Diseases of the digestive system
1749	Pomeranian	1	M	foreign body ingestion	Diseases of the digestive system
1750	Poodle	1	M	foreign body ingestion	Diseases of the digestive system
1751	unknown	1	F	foreign body ingestion	Diseases of the digestive system
1752	Poodle	1	F	foreign body ingestion	Diseases of the digestive system
1753	Poodle	1	F	foreign body ingestion	Diseases of the digestive system
1754	Poodle	1	F	foreign body ingestion	Diseases of the digestive system
1755	Mixed	1	M	foreign body ingestion	Diseases of the digestive system
1756	Poodle	1	M	foreign body ingestion	Diseases of the digestive system
1757	Maltese	1	F	foreign body ingestion	Diseases of the digestive system
1758	Poodle	1	M	foreign body ingestion	Diseases of the digestive system
1759	Dachshund	1	F	foreign body ingestion	Diseases of the digestive system
1760	Poodle	1	F	foreign body ingestion	Diseases of the digestive system
1761	Pointer	1	F	foreign body ingestion	Diseases of the digestive system
1762	Maltese	1	F	foreign body ingestion	Diseases of the digestive system
1763	Poodle	1	F	foreign body ingestion	Diseases of the digestive system
1764	Maltese	1	F	foreign body ingestion	Diseases of the digestive system
1765	Jack Russell Terrier	1	F	foreign body ingestion	Diseases of the digestive system
1766	Dachshund	1	M	foreign body ingestion	Diseases of the digestive system
1767	Pomeranian	1	M	foreign body ingestion	Diseases of the digestive system
1768	Pomeranian	1	M	foreign body ingestion	Diseases of the digestive system
1769	Maltese	1	M	foreign body ingestion	Diseases of the digestive system
1770	Poodle	1	M	foreign body ingestion	Diseases of the digestive system
1771	pompitz	1	M	foreign body ingestion	Diseases of the digestive system
1772	Maltese	1	M	foreign body ingestion	Diseases of the digestive system
1773	Poodle	1	F	foreign body ingestion	Diseases of the digestive system
1774	Dachshund	1	M	foreign body ingestion	Diseases of the digestive system
1775	Maltese	1	F	foreign body ingestion	Diseases of the digestive system
1776	Maltese	1	F	foreign body ingestion	Diseases of the digestive system
1777	Maltese	1	F	foreign body ingestion	Diseases of the digestive system
1778	Poodle	1	M	foreign body ingestion	Diseases of the digestive system
1779	Dachshund	1	M	foreign body ingestion	Diseases of the digestive system
1780	Dachshund	1	M	foreign body ingestion	Diseases of the digestive system
1781	Shih Tzu	1	M	foreign body ingestion	Diseases of the digestive system
1782	Poodle	1	M	foreign body ingestion	Diseases of the digestive system
1783	Boston Terrier	1	M	foreign body ingestion	Diseases of the digestive system
1784	Poodle	1	M	foreign body ingestion	Diseases of the digestive system
1785	Mixed	1	F	foreign body ingestion	Diseases of the digestive system
1786	Poodle	1	F	foreign body ingestion	Diseases of the digestive system
1787	Pomeranian	1	M	foreign body ingestion	Diseases of the digestive system
1788	Poodle	1	M	foreign body ingestion	Diseases of the digestive system
1789	Maltese	1	M	foreign body ingestion	Diseases of the digestive system
1790	Chow Chow	1	M	foreign body ingestion	Diseases of the digestive system
1791	Bichon Frise	1	M	foreign body ingestion	Diseases of the digestive system
1792	Miniature Pinscher	1	M	foreign body ingestion	Diseases of the digestive system
1793	Poodle	1	F	foreign body ingestion	Diseases of the digestive system
1794	Pomeranian	1	M	foreign body ingestion	Diseases of the digestive system
1795	Maltese	1	M	foreign body ingestion	Diseases of the digestive system
1796	pompitz	1	M	foreign body ingestion	Diseases of the digestive system
1797	Pomeranian	1	M	foreign body ingestion	Diseases of the digestive system
1798	Chihuahua	1	M	foreign body ingestion	Diseases of the digestive system
1799	Chihuahua	1	M	foreign body ingestion	Diseases of the digestive system
1800	Poodle	1	F	foreign body ingestion	Diseases of the digestive system
1801	Maltese	1	M	foreign body ingestion	Diseases of the digestive system
1802	Poodle	1	M	foreign body ingestion	Diseases of the digestive system
1803	Pug	1	0	foreign body ingestion	Diseases of the digestive system
1804	Dachshund	1	F	foreign body ingestion	Diseases of the digestive system
1805	Poodle	1	M	foreign body ingestion	Diseases of the digestive system
1806	Poodle	1	M	foreign body ingestion	Diseases of the digestive system
1807	Schnauzers	1	F	foreign body ingestion	Diseases of the digestive system
1808	Poodle	1	F	foreign body ingestion	Diseases of the digestive system
1809	Yorkshire Terrier	1	M	foreign body ingestion	Diseases of the digestive system
1810	Maltese	1	M	foreign body ingestion	Diseases of the digestive system
1811	Chihuahua	1	F	foreign body ingestion	Diseases of the digestive system
1812	Poodle	1	F	foreign body ingestion	Diseases of the digestive system
1813	Bulldog	1	F	foreign body ingestion	Diseases of the digestive system
1814	Chihuahua	1	M	foreign body ingestion	Diseases of the digestive system
1815	Bichon Frise	2	M	foreign body ingestion	Diseases of the digestive system
1816	Pomeranian	2	M	foreign body ingestion	Diseases of the digestive system
1817	Poodle	2	M	foreign body ingestion	Diseases of the digestive system
1818	Maltese	2	F	foreign body ingestion	Diseases of the digestive system
1819	Labrador Retriever	2	M	foreign body ingestion	Diseases of the digestive system
1820	Maltese	2	F	foreign body ingestion	Diseases of the digestive system
1821	Pomeranian	2	M	foreign body ingestion	Diseases of the digestive system
1822	Maltese	2	M	foreign body ingestion	Diseases of the digestive system
1823	Poodle	2	F	foreign body ingestion	Diseases of the digestive system
1824	Dachshund	2	M	foreign body ingestion	Diseases of the digestive system
1825	Yorkshire Terrier	2	F	foreign body ingestion	Diseases of the digestive system
1826	Yorkshire Terrier	2	M	foreign body ingestion	Diseases of the digestive system
1827	Poodle	2	F	foreign body ingestion	Diseases of the digestive system
1828	Mixed	2	F	foreign body ingestion	Diseases of the digestive system
1829	Pomeranian	2	F	foreign body ingestion	Diseases of the digestive system
1830	Boston Terrier	2	M	foreign body ingestion	Diseases of the digestive system
1831	Pomeranian	2	M	foreign body ingestion	Diseases of the digestive system
1832	spitz	2	F	foreign body ingestion	Diseases of the digestive system
1833	Chihuahua	2	M	foreign body ingestion	Diseases of the digestive system
1834	Maltese	2	M	foreign body ingestion	Diseases of the digestive system
1835	Maltese	2	M	foreign body ingestion	Diseases of the digestive system
1836	Beagle	2	M	foreign body ingestion	Diseases of the digestive system
1837	Maltese	2	M	foreign body ingestion	Diseases of the digestive system
1838	Dachshund	2	M	foreign body ingestion	Diseases of the digestive system
1839	Shih Tzu	2	F	foreign body ingestion	Diseases of the digestive system
1840	Maltese	2	M	foreign body ingestion	Diseases of the digestive system
1841	Bichon Frise	2	F	foreign body ingestion	Diseases of the digestive system
1842	Shih Tzu	2	M	foreign body ingestion	Diseases of the digestive system
1843	Chihuahua	2	M	foreign body ingestion	Diseases of the digestive system
1844	Maltese	2	M	foreign body ingestion	Diseases of the digestive system
1845	Poodle	2	M	foreign body ingestion	Diseases of the digestive system
1846	Chihuahua	2	M	foreign body ingestion	Diseases of the digestive system
1847	Maltese	2	F	foreign body ingestion	Diseases of the digestive system
1848	Bichon Frise	2	M	foreign body ingestion	Diseases of the digestive system
1849	Maltese	2	M	foreign body ingestion	Diseases of the digestive system
1850	Maltese	2	F	foreign body ingestion	Diseases of the digestive system
1851	Pomeranian	2	F	foreign body ingestion	Diseases of the digestive system
1852	Yorkshire Terrier	2	F	foreign body ingestion	Diseases of the digestive system
1853	Maltese	2	M	foreign body ingestion	Diseases of the digestive system
1854	Miniature Pinscher	2	F	foreign body ingestion	Diseases of the digestive system
1855	Yorkshire Terrier	2	M	foreign body ingestion	Diseases of the digestive system
1856	Maltese	2	F	foreign body ingestion	Diseases of the digestive system
1857	Maltese	2	F	foreign body ingestion	Diseases of the digestive system
1858	Poodle	2	M	foreign body ingestion	Diseases of the digestive system
1859	Pomeranian	3	M	foreign body ingestion	Diseases of the digestive system
1860	Maltese	3	F	foreign body ingestion	Diseases of the digestive system
1861	Poodle	3	M	foreign body ingestion	Diseases of the digestive system
1862	Maltese	3	F	foreign body ingestion	Diseases of the digestive system
1863	Mixed	3	M	foreign body ingestion	Diseases of the digestive system
1864	Poodle	3	M	foreign body ingestion	Diseases of the digestive system
1865	Yorkshire Terrier	3	M	foreign body ingestion	Diseases of the digestive system
1866	Maltese	3	M	foreign body ingestion	Diseases of the digestive system
1867	Dachshund	3	F	foreign body ingestion	Diseases of the digestive system
1868	Dachshund	3	F	foreign body ingestion	Diseases of the digestive system
1869	Pomeranian	3	M	foreign body ingestion	Diseases of the digestive system
1870	Chihuahua	3	F	foreign body ingestion	Diseases of the digestive system
1871	Chihuahua	3	M	foreign body ingestion	Diseases of the digestive system
1872	Maltese	3	F	foreign body ingestion	Diseases of the digestive system
1873	Poodle	3	M	foreign body ingestion	Diseases of the digestive system
1874	Shih Tzu	3	F	foreign body ingestion	Diseases of the digestive system
1875	Maltese	3	M	foreign body ingestion	Diseases of the digestive system
1876	Maltese	3	F	foreign body ingestion	Diseases of the digestive system
1877	Chihuahua	3	F	foreign body ingestion	Diseases of the digestive system
1878	Chihuahua	3	F	foreign body ingestion	Diseases of the digestive system
1879	Maltese	3	M	foreign body ingestion	Diseases of the digestive system
1880	Maltese	3	M	foreign body ingestion	Diseases of the digestive system
1881	Chihuahua	3	M	foreign body ingestion	Diseases of the digestive system
1882	Maltese	3	M	foreign body ingestion	Diseases of the digestive system
1883	spitz	3	M	foreign body ingestion	Diseases of the digestive system
1884	Poodle	3	M	foreign body ingestion	Diseases of the digestive system
1885	Beagle	3	F	foreign body ingestion	Diseases of the digestive system
1886	Yorkshire Terrier	3	F	foreign body ingestion	Diseases of the digestive system
1887	Miniature Pinscher	4	M	foreign body ingestion	Diseases of the digestive system
1888	Poodle	4	M	foreign body ingestion	Diseases of the digestive system
1889	Shih Tzu	4	M	foreign body ingestion	Diseases of the digestive system
1890	Maltese	4	M	foreign body ingestion	Diseases of the digestive system
1891	Dachshund	4	M	foreign body ingestion	Diseases of the digestive system
1892	Golden Retriever	4	F	foreign body ingestion	Diseases of the digestive system
1893	Pomeranian	4	M	foreign body ingestion	Diseases of the digestive system
1894	Poodle	4	F	foreign body ingestion	Diseases of the digestive system
1895	spitz	4	M	foreign body ingestion	Diseases of the digestive system
1896	Maltese	4	M	foreign body ingestion	Diseases of the digestive system
1897	Maltese	4	M	foreign body ingestion	Diseases of the digestive system
1898	spitz	4	F	foreign body ingestion	Diseases of the digestive system
1899	Poodle	4	M	foreign body ingestion	Diseases of the digestive system
1900	Poodle	5	M	foreign body ingestion	Diseases of the digestive system
1901	Maltese	5	M	foreign body ingestion	Diseases of the digestive system
1902	Maltese	5	M	foreign body ingestion	Diseases of the digestive system
1903	Pekingese	5	F	foreign body ingestion	Diseases of the digestive system
1904	Chihuahua	5	M	foreign body ingestion	Diseases of the digestive system
1905	Pomeranian	5	M	foreign body ingestion	Diseases of the digestive system
1906	Shih Tzu	5	M	foreign body ingestion	Diseases of the digestive system
1907	Shih Tzu	5	M	foreign body ingestion	Diseases of the digestive system
1908	Maltese	5	F	foreign body ingestion	Diseases of the digestive system
1909	Maltese	5	F	foreign body ingestion	Diseases of the digestive system
1910	Pomeranian	5	M	foreign body ingestion	Diseases of the digestive system
1911	Maltese	5	M	foreign body ingestion	Diseases of the digestive system
1912	Maltese	5	M	foreign body ingestion	Diseases of the digestive system
1913	JINDO + AKIDA	5	M	foreign body ingestion	Diseases of the digestive system
1914	unknown	5	F	foreign body ingestion	Diseases of the digestive system
1915	Chihuahua	5	M	foreign body ingestion	Diseases of the digestive system
1916	Poodle	5	F	foreign body ingestion	Diseases of the digestive system
1917	Yorkshire Terrier	5	M	foreign body ingestion	Diseases of the digestive system
1918	Shih Tzu	5	M	foreign body ingestion	Diseases of the digestive system
1919	Mixed	6	F	foreign body ingestion	Diseases of the digestive system
1920	Maltese	6	M	foreign body ingestion	Diseases of the digestive system
1921	Chihuahua	6	M	foreign body ingestion	Diseases of the digestive system
1922	Maltese	6	M	foreign body ingestion	Diseases of the digestive system
1923	Maltese	6	M	foreign body ingestion	Diseases of the digestive system
1924	unknown	6	M	foreign body ingestion	Diseases of the digestive system
1925	Yorkshire Terrier	6	M	foreign body ingestion	Diseases of the digestive system
1926	Chihuahua	7	M	foreign body ingestion	Diseases of the digestive system
1927	Maltese	7	M	foreign body ingestion	Diseases of the digestive system
1928	Maltese	7	M	foreign body ingestion	Diseases of the digestive system
1929	Shih Tzu	7	F	foreign body ingestion	Diseases of the digestive system
1930	Shih Tzu	7	M	foreign body ingestion	Diseases of the digestive system
1931	Maltese	7	F	foreign body ingestion	Diseases of the digestive system
1932	Shih Tzu	8	M	foreign body ingestion	Diseases of the digestive system
1933	Shih Tzu	8	F	foreign body ingestion	Diseases of the digestive system
1934	Maltese	8	M	foreign body ingestion	Diseases of the digestive system
1935	French Bulldog	8	M	foreign body ingestion	Diseases of the digestive system
1936	Shih Tzu	8	M	foreign body ingestion	Diseases of the digestive system
1937	Poodle	8	M	foreign body ingestion	Diseases of the digestive system
1938	Pomeranian	9	F	foreign body ingestion	Diseases of the digestive system
1939	Shih Tzu	9	M	foreign body ingestion	Diseases of the digestive system
1940	Pekingese	9	M	foreign body ingestion	Diseases of the digestive system
1941	Maltese	9	M	foreign body ingestion	Diseases of the digestive system
1942	Maltese	9	M	foreign body ingestion	Diseases of the digestive system
1943	Shih Tzu	9	M	foreign body ingestion	Diseases of the digestive system
1944	Miniature Pinscher	9	F	foreign body ingestion	Diseases of the digestive system
1945	Maltese	9	M	foreign body ingestion	Diseases of the digestive system
1946	Maltese	9	F	foreign body ingestion	Diseases of the digestive system
1947	Pomeranian	12	F	foreign body ingestion	Diseases of the digestive system
1948	unknown	1	M	foreign body ingestion	Diseases of the digestive system
1949	Chihuahua	3	F	foreign body ingestion	Diseases of the digestive system
1950	Shih Tzu	5	M	foreign body ingestion	Diseases of the digestive system
1951	Maltese	unknown	F	foreign body ingestion	Diseases of the digestive system
1952	Shih Tzu	unknown	0	foreign body ingestion	Diseases of the digestive system
1953	Mixed	10	M	Gastritis	Diseases of the digestive system
1954	Poodle	2	F	Gastritis	Diseases of the digestive system
1955	Pomeranian	3	M	Gastritis	Diseases of the digestive system
1956	Pekingese	10	M	Gastroenteritis	Diseases of the digestive system
1957	Maltese	1	F	Gastroenteritis	Diseases of the digestive system
1958	Pomeranian	2	M	Gastroenteritis	Diseases of the digestive system
1959	Golden Retriever	4	F	Gastroenteritis	Diseases of the digestive system
1960	Golden Retriever	4	F	Gastroenteritis	Diseases of the digestive system
1961	Shih Tzu	4	M	Gastroenteritis	Diseases of the digestive system
1962	Afghan Hound	7	M	Gastroenteritis	Diseases of the digestive system
1963	Cocker Spaniel	9	M	GDV	Diseases of the digestive system
1964	Shih Tzu	14	M	Hepatobiliary injury	Diseases of the digestive system
1965	Maltese	4	F	Hepatobiliary injury	Diseases of the digestive system
1966	Boston Terrier	10	M	Hernia, unspecified	Diseases of the digestive system
1967	Boston Terrier	10	M	Hernia, unspecified	Diseases of the digestive system
1968	Boston Terrier	10	M	Hernia, unspecified	Diseases of the digestive system
1969	Maltese	11	M	Hernia, unspecified	Diseases of the digestive system
1970	Yorkshire Terrier	11	M	Hernia, unspecified	Diseases of the digestive system
1971	Mixed	11	F	Hernia, unspecified	Diseases of the digestive system
1972	Mixed	12	F	Hernia, unspecified	Diseases of the digestive system
1973	Pomeranian	1	F	Hernia, unspecified	Diseases of the digestive system
1974	Dachshund	1	F	Hernia, unspecified	Diseases of the digestive system
1975	OLD ENGLISH SHEEPDOG	1	F	Hernia, unspecified	Diseases of the digestive system
1976	Chow Chow	1	M	Hernia, unspecified	Diseases of the digestive system
1977	Yorkshire Terrier	1	F	Hernia, unspecified	Diseases of the digestive system
1978	Dachshund	1	F	Hernia, unspecified	Diseases of the digestive system
1979	Pekingese	2	F	Hernia, unspecified	Diseases of the digestive system
1980	Poodle	3	M	Hernia, unspecified	Diseases of the digestive system
1981	Maltese	4	F	Hernia, unspecified	Diseases of the digestive system
1982	Maltese	4	M	Hernia, unspecified	Diseases of the digestive system
1983	Maltese	4	M	Hernia, unspecified	Diseases of the digestive system
1984	Bichon Frise	4	F	Hernia, unspecified	Diseases of the digestive system
1985	Maltese	5	F	Hernia, unspecified	Diseases of the digestive system
1986	Maltese	5	M	Hernia, unspecified	Diseases of the digestive system
1987	Maltese	5	M	Hernia, unspecified	Diseases of the digestive system
1988	Shih Tzu	9	M	Hernia, unspecified	Diseases of the digestive system
1989	Mixed	10	M	Hernia, unspecified	Diseases of the digestive system
1990	Bichon Frise	1	M	Hernia, unspecified	Diseases of the digestive system
1991	Mixed	1	F	Hernia, unspecified	Diseases of the digestive system
1992	Maltese	1	M	Hernia, unspecified	Diseases of the digestive system
1993	Chihuahua	1	F	Hernia, unspecified	Diseases of the digestive system
1994	Chihuahua	1	M	Hernia, unspecified	Diseases of the digestive system
1995	Chihuahua	1	M	Hernia, unspecified	Diseases of the digestive system
1996	Shih Tzu	2	M	Hernia, unspecified	Diseases of the digestive system
1997	Bichon Frise	2	M	Hernia, unspecified	Diseases of the digestive system
1998	Chihuahua	3	M	Hernia, unspecified	Diseases of the digestive system
1999	Chihuahua	3	M	Hernia, unspecified	Diseases of the digestive system
[truncated: 13,532 more rows]
