# Supplementary material for: Major medical causes by breed and life stage for dogs presented at veterinary clinics in the Republic of Korea: a survey of electronic medical records
Source: PeerJ. 2018 Jul 3;6:e5161. doi: 10.7717/peerj.5161 (PMC6035722; doi:10.7717/peerj.5161)
Supplement: Supplemental Information 2 — First sheet includes information about age profile for Fig. 1; Second sheet includes information about breed profile for Fig. 2; Third sheet includes information about ICD category for Fig. 3; Fourth sheet includes information about presenting signs or diagnoses for Fig. 4. [file peerj-06-5161-s002.xlsx]

## Sheet: Age_profile
Age profile for Figure 1
Age	Numbers	percentage		Age groups	percentage
<1	136	0.00875668		< 1 y	0.00875668
1	4275	0.275256		1-3 y	0.529586
2	2525	0.162578		4-6 y	0.173202
3	1425	0.091752		7-9 y	0.107591
4	1084	0.0697959		10-12 y	0.0797115
5	877	0.0564677		13-15 y	0.0719207
6	729	0.0469384		> 16 y	0.0218273
7	573	0.036894
8	541	0.0348336
9	557	0.0358638
10	451	0.0290387
11	424	0.0273002
12	363	0.0233726
13	358	0.0230507
14	428	0.0275578
15	331	0.0213122
16	184	0.0118473
17	92	0.00592364
18	29	0.00186723
19	29	0.00186723
20	5	0.000321937
unknown	115	0.00740455
Total numbers (%)	15531	1

## Sheet: breed_profile
Breed profile for Figure 2
Breed	Numbers	percentage
Maltese	3908	0.251626
Poodle	2400	0.15453
Pomeranian	1370	0.0882107
Shih Tzu	1157	0.0744962
Mixed	1116	0.0718563
Yorkshire Terrier	1050	0.0676067
Chihuahua	626	0.0403065
Others	3904	0.251368
Total Numbers (%)	15531	1

## Sheet: ICD
ICD for Figure 3
ICD category	Numbers	percentage
Diseases of the skin	2851	0.183568
Diseases of the digestive system	2169	0.139656
Prevent medicine	1784	0.114867
Diseases of the ear or mastoid process	1608	0.103535
Diseases of the visual system	1021	0.0657395
Diseases of the musculoskeletal system or connective tissue	988	0.0636147
Diseases of the respiratory system	921	0.0593008
Injury, poisoning or certain other consequences of external causes	679	0.043719
Neutering surgery	660	0.0424957
Diseases of the genitourinary system	600	0.0386324
Symptoms, signs or clinical findings, not elsewhere classified	439	0.028266
Dental care	353	0.0227287
Factors influencing health status or contact with health services	333	0.021441
Pregnancy, childbirth or the puerperium	192	0.0123624
Diseases of the nervous system	184	0.0118473
Certain infectious or parasitic diseases	181	0.0116541
Diseases of the circulatory system	147	0.00946494
Neoplasms	102	0.00656751
Microchipped	99	0.00637435
Endocrine, nutritional or metabolic diseases	95	0.0061168
External causes of morbidity or mortality	57	0.00367008
Mental, behavioural or neurodevelopmental disorders	31	0.00199601
Diseases of the blood or blood-forming organs	19	0.00122336
Developmental anomalies	10	0.000643874
Diseases of the immune system	6	0.000386324
Sleep-wake disorders	1	6.43874e-05
Traditional Medicine conditions	1	6.43874e-05
Total number (%)	15531	1

## Sheet: Presenting signs and diagnoses
Presenting signs and diagnoses for Figure 4
Rank	Presenting signs and diagnoses for Fig. 4	Numbers	percentage
1	Preventive medicine	1785	0.114931
2	Dermatitis or eczema, unspecified	988	0.0636147
3	Otitis externa	976	0.0628421
4	Diarrhea	814	0.0524113
5	Vomiting	770	0.0495783
6	Neutering surgery	660	0.0424957
7	Lameness	571	0.0367652
8	Upper respiratory tract disease	446	0.0287168
9	Trauma	421	0.0271071
10	Malassezia infection, ear	361	0.0232438
11	Erythema, Pruritus, unspecified	329	0.0211834
12	Wound	303	0.0195094
13	General health check	296	0.0190587
14	Dermatomycoses	295	0.0189943
15	Conjuctivitis	231	0.0148735
16	Foreign body ingestion	228	0.0146803
17	Patella luxation	206	0.0132638
18	Gingivatitis	193	0.0124268
19	Respiratory disorder, unspecified	185	0.0119117
20	Pyoderma	171	0.0110102
21	Disorders of orbit, unspecified	162	0.0104308
22	Loss of appetite	161	0.0103664
23	Ear pruritus, unspecified	146	0.00940055
24	Mass/nodule	132	0.00849913
25	Heart disease	124	0.00798403
26	Tick infection	123	0.00791964
27	Alopecia	118	0.00759771
28	Pregnancy	116	0.00746893
29	Tooth extraction	114	0.00734016
30	Papule	106	0.00682506
31	Allergic dermatitis	101	0.00650312
	Others	3899	0.251046
	Total number (%)	15531	1
